# Supplementary material for: International Observational Analysis of Evolution and Outcomes of Chronic Stable Angina: The Multinational CLARIFY Study
Source: PubMed Central journal article supplement (PMC8360663; doi:10.1161/circulationaha.121.054567), 2021-07-15
Supplement: cir-144-512-s001.pdf [file cir-144-512-s001.pdf]

## SUPPLEMENTAL MATERIAL

### Table of Contents

|                                                                                                                                                          |    |
|----------------------------------------------------------------------------------------------------------------------------------------------------------|----|
| CLARIFY Registry Investigators .....                                                                                                                     | 2  |
| Table I. Countries in the Six Defined Geographic Areas .....                                                                                             | 8  |
| Table II. Prevalence of Angina at Baseline According to Each of the Inclusion Criteria (Not Mutually Exclusive).....                                     | 9  |
| Table III. 5-year Outcomes According to Anginal Status at Baseline.....                                                                                  | 10 |
| Table IV. Baseline Characteristics of Patients Alive With Missing Angina Status at 1 and 5 Years of Follow-Up .....                                      | 11 |
| Table V. Severity of Angina at Baseline, 1-Year and 5-Year Follow-Up, in 7212 Patients with Angina at Baseline .....                                     | 14 |
| Figure I. Graphic Representation of the Number of Patients Fulfilling Each of the Four Inclusion Criteria (Not Mutually Exclusive) .....                 | 15 |
| Figure II. Evolution of Angina in Patients With Stable Coronary Artery Disease Without Imputation of Missing Values.....                                 | 16 |
| Figure III. Evolution of Angina in Patients with Stable Coronary Artery Disease: Full Population Scale.....                                              | 17 |
| Figure IV. Sensitivity Analysis: Exclusion of Patients From Eastern Europe; Evolution of Angina in Patients With Stable Coronary Artery Disease .....    | 18 |
| Figure V. Sensitivity Analysis: Exclusion of Patients From Eastern Europe; Clinical Outcomes According to the Evolution of Angina at 1 Year .....        | 19 |
| Figure VI. Consequences of Angina and Evolution of Angina at 1 Year (Primary Outcome of Cardiovascular Death or Myocardial Infarction) in Subgroups..... | 20 |

## CLARIFY Registry Investigators

### CLARIFY Executive Committee

P G Steg (chair), Paris, France; R Ferrari, Ferrara, Italy; I Ford, Glasgow, UK; KM Fox, London, UK; J C Tardif, Montreal, Canada; M Tendera, Katowice, Poland.

### CLARIFY Steering Committee

**Argentina:** Prof. Dr. Fernando José Sokn; **Australia:** Prof. Christopher Reid; **Austria:** Prof. Irene Lang; **Belgium:** Dr. Frank Van den Branden; **Brazil:** Prof. Luis Machado César; Prof. Marco Antonio Mattos; **Brunei:** Dr. Hj. Nazar Luqman; **Bulgaria:** Prof. Assen Goudev; **Canada:** Dr Paul Dorian; **China:** Prof. Dayi Hu; **Czech Republic:** Prof. Petr Widimsky; **Denmark:** Dr. Christian Hassager; **France:** Prof. Nicolas Danchin; **Germany:** Prof. Dr. med. Stefan Kääh; **Greece:** Prof. Panos Vardas; **Gulf Countries:** Dr. Kadhim J. Sulaiman (**Oman**), Dr. Wael Al Mahmeed (**UAE**), Dr. Jassim Al Suwaidi (**Qatar**), Dr. Ibrahim Al Rashdan (**Kuwait**), Dr. Fuad Abdulkader (**Bahrain**); **Hungary:** Prof. Béla Merkely; **India:** Prof. Upendra Kaul; **Ireland:** Prof. Kieran Daly; **Italy:** Prof. Luigi Tavazzi, Prof. Roberto Ferrari; **Korea:** Prof. Yangsoo Jang; **Latvia:** Prof. Andrejs Erglis; **Lithuania:** Prof. Aleksandras Laucevičius; **Malaysia:** Dr. Ahmad Nizar Jamaluddin; **Mexico:** Prof. Marco Alcocer Gamba; **Netherlands:** Dr. Igor I. Tulevski; **Poland:** Prof. Janina Stępińska; **Portugal:** Prof. João Morais; **Romania:** Prof. Dr. Cezar Macarie; **Russia:** Prof Rafael Oganov, Prof Svetlana Shalnova; **Saudi Arabia:** Prof Muayed Al-Zaibag; **Singapore:** Dr. Mak Koon Hou; **Slovakia:** Assoc. Prof. Gabriel Kamensky; **Slovenia:** Prof. Zlatko Fras, Dr. Vojko Kanič; **South Africa:** Prof. Datshana Prakesh Naidoo; **Spain:** Prof. José Luis Zamorano; **Switzerland:** Prof. Hans Rickli, Dr. Andres Jaussi; **Thailand:** Assoc. Prof. Charn Sriratanasathavorn; **UK:** Dr. Paul Kalra; **Ukraine:** Prof. Mykhailo Lutai, Prof. Oleksandr Parkhomenko; **Vietnam:** Prof Lan Viet Nguyen; **West Indies:** Dr. Ronald Henry.

### CLARIFY Investigators

**Argentina:** A. Ahuad Guerrero, M. Basara, F. Belcastro, J.A. Bertarini, C. Cazenave, H. Dreycopp, J. Egido, J. Estrella, D. Garofalo, J. Giordano, H. Lagioia, N. Lago, R. La Greca, L. Lema, N. Lopez Cabanillas, H. Luquez, C. Miller, E. Prada, P. Rodenas, R.G. Schena, G. Suarez, A. Tomatti; **Australia:** D.M. Colquhoun, A. Conradie, S. Cox, D. Cross, R. Fathi, B. Fitzgerald, I. Hamilton-Craig, G. Holt, S. R. Jayasinghe, N. Mai, J. Moolman, R. A. Motyer, K. Phillips, A. Rafter, A. Rahman, A. Rainbird, G. Scalia, A. Taylor, P. West, K. Alford, R. Amor, P. Astridge, B. Bastian, F. Bates, M. M. Doohan, J. Du Plooy, J. C. Ford, L. Kanagaratnam, V. Khoury, R. Parkin, J. Rogers, G. Sceats, A. Waldman, D. Wang, S. Wright, J. Ardill, P. Aylward, J. F. Beltrame, J. Bradley, W. Hedde, M. Joseph, S. Rajendran, S. Varughese, E. Brice, B. Hockings, J. Janssen, A. Kozlowski, J. O'Shea, J. Tan, D. A. Playford, K. Woollard, A. Ajani, G. Barron, N. Better, T. Carruthers, B. Chan, R. Chan, J. Cotroneo, J. T. Counsell, D. S. Eccleston, B. H. R. Forge, A. Hamer, M. Horrigan, V. M. J. Jelinek, R. Lew, D. O'Donnell, F. Panetta, M. Sebastian, P. Shetty, A. Soward, P. Srivastava, N. F. Strathmore, S. Sylivris, G. Szto, V. Veth, T. Yip; **Austria:** R. Badr-Eslam, L. Kleemann, G. Steurer, B. Mörz-Proszowski, F. Auhser, U. Teleky, G. Sepp, A. Beinhauer, D. Kerö, C. Lavicka, T. Perger, V. Hadjiivanov, M. Feldner-Busztin, R. Mika, W. Filip, A. Mahr, J. Toplak, M. G. Millauer, P. Haralambus, K. Walcher, K.H. Karner, E. Ziak, P. Painsipp, U. Frank, A. Suntinger, W. Gritsch, G. Bode, R. Herrmann, R. Raffelsberger, H. Topf, E. Moser, J. Föchterle, T. Honsig, K. Mayr, H. Mayr, R. Kaserbacher, A. Dzien, E. Galehr, M. Felbermayer, R. Schwarz; **Belgium:** R. Amini, H. Appeltants, A. Ballet, C. De Niel, G. Berkenboom, X. Bernard, T. Bouvy, M. Claeys, Y. Dascotte, L. Davin, T. De Backer, A. De Meester, S. De Ridder, P. Dendale, K. Deneff, M. Emonts, J. T. M. Geraedts, M. Goethals, J-M. Grégoire, T. Herbots, E. Hoffër, W. H. J. Hutse, P. Lafontaine, P. Lefebvre, H. Lesseliers, G. Odent, A. Pasquet, B. Peperstraete, P. Purnode, A. Rogowsky, M. Rosseel, J-P. Salembier, P. Surmont, A. M. F. Vandeplass, S. Van de Walle, F. Van den Branden, P. Vandergoten, B. G. Vanhauwaert, L. Vanneste, J. Vercammen, D. Verleyen, D. Vermander, C. Weytjens; **Brazil:** A. Rocha de Lorenzo, A. Felice Castro Issa, B. Mahler Mioto, C. de Brito Vianna, C. Okawabata, E. Giusti Rossi, F. Fernandes, F. Pitella, F. Henpin Yue Cesena, J. F. Monteiro Ferreira, J. F. Junior, L. Tonet, L. Machado Cesar, L. H. Gowdak, M. A. Matos, M. Moretti, R. Vicente Amato, R. Tadeu Munhoz, S. R. Coimbra; **Brazil:** A. Rocha de Lorenzo, A. Felice Castro Issa, B. Mahler Mioto, C. de Brito Vianna, C. Okawabata, E. Giusti Rossi, F. Fernandes, F. Pitella, F. Henpin Yue Cesena, J. F. Monteiro Ferreira, J. F. Junior, L. Tonet, L. Machado Cesar, L. H. Gowdak, M. A. Matos, M. Moretti, R. Vicente Amato, R. Tadeu Munhoz, S. R. Coimbra; **Brunei:** H. N. Luqman; **Bulgaria:** S. Yakovova, M. Mantcheva, V. Mincheva, L. Baurenski, K. Karastanev, V. Yordanova, Y. Peneva; **Canada:** P. Wong, M. Fagan, G. Sabe-Affaki, F. M. Villasenor, W. K. Son, D. E. Manyari, N. Giacomanantonio, B. J. Lubelsky, D. Ezekiel, J. C.S. Leong, A. Grover, J. Vavougios, Y. Pesant, A. M. Kushner, M. M. W. Yeung, G. E. Vertes, F. J. Nasser-Sharif, D. Spensieri, A. Roy, T. T. Nguyen, M. Leclair, P. Morra, C. Everton Biglow, J. F. Baril, K. Lai, D. S. Wong, V. Martinho, G. A. Antoniadis, G. R. Searles, D. Rouse, G. Brisson, S. King Wong, R. S. Collette, M. S. C. Ho, C. Constance, R. Gendreau, G. W. Kellam, T. A. Cieza Lara, H. A. Boyrazian, M. Shamsuzzaman, D. R. Spink Jr., A. P. T. Wong, J. Janes, M. Czarnecka, D. Saulnier, G. Levesque, P. F. Clavette, A. Kokis, T. L. Orenstein-Lyall, A. Shekhar Pandey, J. Robb, G. Verret, W. Czarnecki, F. Perreault, G. Chouinard, G. Lafrance, G. M. Fullerton, P. LeBouthillier, Q. H. Tran, I. Rodriguez Marrero, F. B. Ramadan, P. Talbot, M. A. Fazil, J. Yi-Ming

Cha, S. Garg, R. Chehayeb, B. Roy, Y. K. Chan, H. E. Harlos, H. B. Matheson, R. Patel, G. F. Vaz, J. S. Bhatt, E. Liu, T. H. Ashton, H. Sullivan, L. P. Quinn, K. Yared, A. K. Gupta, B. Sullivan, J. Campbell, S. Pallie, H. H. Kim, D. Savard, J. M. Cherry, J. Gold, G. Brouillette, A. Belanger, J. Berlingieri, W. Nisker, G. Boutros, A. I. Bakbak, L. Lasalle; **China**: LL. Chen, MH. Chen, MY. Chen, XP. Chen, YD. Chen, HL. Cong, SF. Ding, JT. Dong, SH. Dong, ZM. Du, LL. Feng, W. Gao, H. Ge, SJ. Ge, T. Guo, Y. Guo, Z. Huang, Y. Huo, HG. Jin, YN. Ke, HW. Li, HM. Li, ZC. Li, YJ. Li, JL. Liu, QL. Liu, SW. Liu, SZ. Lv, W. Miao, GZ. Pan, XD. Pu, ZM. Qian, X. Su, JH. Tao, HP. Wang, JA. Wang, NF. Wang, T. Wang, W. Wang, Y. Wang, M. Wei, SY. Wu, YJ. Wu, LG. Xiong, D. Xu, J. Yan, K. Yang, M. Yang, TL. Yang, XL. Yang, JM. Yu, HS. Zeng, H. Zhang, HQ. Zhang, L. Zhang, SX. Zhou, YL. Zhou. **Czech Republic**: J. Bozkova, J. Carda, S. Dedkova, A. Dufka, J. Fridrich, T. Hodac, R. Jirmar, A. Kadleckova, M. Karlicek, J. Krupicka, J. Kuchar, V. Lavicka, J. Leso, Z. Lorenc, M. Micko, P. Navratil, I. Petrova, P. Povolna, L. Raisova, P. Raska, V. Ravlyk, S. Schlesingerova, E. Smrckova, P. Sternthal, H. Stursova, P. Vymetal, **Denmark**: P. Wiggers, J. Markenvar, L. K. Andersen, L. Frost, J. Refsgaard, S. Strange, K. Egstrup, R. Sykulski, P. Hildebrandt, T. Haghfelt, M. Ege, L. Saaby; **France**: S. Cattani, M. Adam-Blanpain, M. Adda, N. Aimouch, L. Ardouin, S. Assouline, A. Aumjaud, C. Barjhoux, R. Baroudi, C. Beaurain, M. A. Bennouna, A. Bernard, C. Bernardeau, E. Blanc, I. Blum-Decary, G. Bodur, C. Boesch, J. Bonal, R. Bonhomme, J. L. Bonnet, J. Bories, M. L. Bourachot, F. Brumelot, M. Brunehaut Petaut, C. Brunshwig, P. Buffet, P. Calmettes, I. Centa, B. Chartier, P. Chemin, F. Chometon, J. Cohen, R. Colin, Y. Cottin, F. Crespo, A. Dabboura, F. David, P. Dehayes, P. Dematteo, O. Dibon, P. Dodemant, V. Dormagen, X. Dreyfus, J. M. Dubois, F. Duclos, M. Ducoudre, O. Duprez, P. Durand, E. Durand, P. Egloff, M. Escande, M. C. Escourrou Berdou, G. Esna Ashari, I. Feldmann, J. Ferrieres, E. Foltzer, B. Fontanet, M. Garandeau, T. Garban, S. Geffroy, T. Gillet, S. Godart, P. Gosse, P. Gratia, O. Greiner, A. Gueusquin, E. Guiu, J. M. Guy, S. Haddad, V. Hennebelle, S. Honorat, A. Hourany, G. Hua, P. Jacquier, S. Jean, R. Jeremiasz, P. Kohler, A. Lacroix, M. Leandri, Y. Lemiere, M. Liautard, P. Loheac, J. C. Louchart, P. Magnus, B. Maheu, H. R. Malaterre, G. Manchet, J. Mantoux, D. Manzi, M. Marachli, M. Maroun, N. Meneveau, E. Messas, J. L. Mougeolle, T. Mouhat, J. J. Muller, M. Naisseh, P. Nocon, D. Onger, A. Ouguoujil, M. Ovize, E. Page, K. Pareathumby, A. Pleskof, P. Poinson, G. Pons, P. Poudrou, J. N. Poujois, V. Probst, F. Prunier, L. Prunier, V. Puel, D. Rechtman, R. Rennert, B. Rijavec, Y. Riou, J. Robert, C. Roche, G. Roul, B. Salaun, B. Saleh, A. Sandalian, M. Sander, A. Schenowitz, A. Silvestre, H. Soleille, S. Tabet, M. Tardy, F. Thomas-Richard, B. Truong, J. Varaldi, H. Vial, J. M. Walch, M. Wazana, R. Zeitouni, H. Audibert, F. Alizon, A. Amlaiky, M. Asplanato, C. Baranes, M. Bariaud, F. Bernasconi, P. Bousquet, C. Ceraulo, G. De Geeter, J. Donetti, B. Doucet, J. Doucet, T. Dutoya, D. Ennouchi, M. H. Fallacher, G. Fouquet, V. Fourchard, J. Gdalia, G. Grollier, S. Guerard, P. A. Jeannerat, Y. Jobic, V. Joulie, P. Jourdain, V. Jouve, R. Ketelers, G. Khaznadar, P. Kohan, B. Koujan, B. Lammens, I. Landragin, E. Le Moal, D. M'Bey, F. Maes, S. Maheas Morlet, R. Massabie, D. Meddah, F. X. Meriaux, C. Mestre-Fernandes, P. Meyssonier, M. Migliore, J. Milewski, J. F. Millet, S. Mingam, P. Nazeyrollas, F. Paganelli, F. Pellerin, F. Petitjean, A. Pinzani, A. Pladys, P. Primot, A. Pucheu, A. Rahali, P. Ravoala, D. Rousson, P. Samama, M. Sardon, R. Silvestri, P. Soskin, X. Tabone, C. Tricot, B. Vaquette, M. Vogel, M. Weingrod, V. Aboyns, R. Amoretti, J. Aubry, P. Berthezene, D. Binet, X. Bonnaud, P. Bonnet, A. Bonny, T. Bouchaya, C. Boureux, J. M. Bourgeois, L. Brottier, B. Cavert, S. Cleron, E. Dechoux, C. Delhomme, J. P. Detienne, J. P. Dubs, B. Faudon, F. Fellous, R. Fressonnet, Y. Garaud, D. Garcia, M. Geneves, J. L. Gleizes, C. Guyetand, B. Hermellin, D. Iovescu, J. P. Kanner, P. Khanoyan, A. Leherissier, A. Maximovitch, B. Merian, P. Messali, Y. Moreau, J. Moyat, L. Payot, L. Petoit Peuch, J. L. Prevot, P. Raymond, D. Relange, S. Reymond, J. F. Robert, H. Rosenstein, J. Schneider, R. Schultz, P. Tanielian, F. Thoin, L. Thomas, P. Touzet, G. Steg, G. Amiel Oster Sauvinet, F. Baylac Domengetroy, K. Chamou, B. Etcheverry, J.L. Farges, J. Y. Fraboulet, M. Goralski, D. Janody, B. Mamez, W. Manlay, F. Paillard, F. Pelier, A. Petit, M. Skonieczny, R. Augarde, J. B. Fournier, S. Liandrat, P. Lim, A. I. Noury, D. Paris, M. Saade, J. M. Stordeur, N. Danchin, M. Pornin, L. Fauchier, M. Galinier, M. A. Balice-Pasquinnelli, P. Sosner, S. Yvorra, E. Delcoulx, F. Mouquet, J. E. Poulard, A. Sudre, P. Heno, F. Biauxque, M. Guenoun, G. Attia, S. Pouwels, L. Carpentier, E. Verbrugge, C. Ziccarelli, M. Elkohen, J. Tricoire, P. Lang, O. Huttin; **Germany**: B-M. Altevogt, U. Altmann, M. Baar, S. Berrisch-Rahmel, A. Birkenhagen, I. Bläse, R. Blindt, R. Bosch, A. Brattström, H-H. Breuer, M. Castrucci, S. Cicek-Hartvig, R. Cierpka, M. Claus, M. Deissner, M. Drexler, T. Eggeling, G. Eisele, D. Enayat, S. Frickel, S. Gessner, K. Giokoglu, J. Gmehling, F. Goss, P. Grooterhorst, D. B. Gysan, R. Haberl, W. Haerer, N. Hassler jun, S. Heinemann-Meerz, F. Henschel, M. Hinrichsen, W. Hofer, A. Hofmeister, G. Hoh, E. Horstkotte, F. Jäger, M. Jeserich, U. Keil, H. Killat, S. Kimmel, M. Kindel, P. Kindler, S. Kleta, J. Könemann, K. König, H. Krause-Allmendinger, K. Kronberg, I. Kruck, V. Männl, A. Meinel, G. Mentz, E. Meyer-Michael, F. Mibach, S. Möller, S. Muth, E. Nelböck-Huber, D. Ohlmeyer, Z. Özkan-Rashed, C- P. Paulus, S. Perings, J. Placke, C. Raters, N. Reifart, A. Rink, K. Rybak, I. Salecker, K-H. Schermaul, U. Schlesinger-Irsch, E. Schmidt, K-H. Schmitz, N. Schön, T. Schröder, B. Sievers, M. Simon, U. Spengler, M. Speth-Nitschke, A. Stumpp, S. Szabo, J. Taggeselle, A. Tamm, A. Thelemann, C. Thelemann, H. Thümmel, G. Unger, A. Utech, J. Volmar, B. Wauer, G. Wehr, L. Weinrich, R. Weinrich, U. Windstetter, J. H. Wirtz, N. Wittlich, P. Ziehn, P. Zündorf; **Greece**: C. Avgerinos, O. Gouli, D. Stergiou, I. Alexopoulos, C. Pappas, I. Petropoulos, G. Chatzioakim, N. Pontikakis, C. Priftis, P. Mpompoth, I. Bourazanis, A. Papatthanasioy, S. Avlonitis, C. Zakopoulos, G. Koutsimpanis, I. Tsamopoulos, C. Christoforidis, V. Zachos, P. Kalaras, M. Karachaliou, C. Liatas, G. Pournaras, G. Theodorakis, I. Orestis, K. Panisois, E.

Chalkiadakis, V. Arfaras, G. Kolios, P. Boutsikos, A. Kotsalos, D. Mitropoulos, A. Samothrakis, K. Svolis, E. Anastasiou, T. Gkinis, P. Dalampyras, A. Kalampalikis, I. Leontaridis, S. Gabriilidis, I. Konstantinidis, V. Plastiras, P. Tarenidis; **Gulf Countries: Oman:** Y. Al Wahshi, P. P. Singh, A. Narayan, F. Al Tamimi, J. Al Yazeedi, M. Ayche, A. Al Lawati, M. Al Dhanki, **United Arab Emirates:** A. Salustri, T. Salah, M. Y. Tamimi, A. Agrawal, A. Wassef, F. Baslaib, G. Al Radaideh, A. Yusufali, N. Bazargani, **Kuwait:** M. Akbar, H. Abdel Wahab, S. Abdel Malak, I. Ghaly, H. Hafez, F. Al Kandari, M. Haiba, M. Alanbaei, **Qatar:** M. M. Gomaa, **Bahrain**—A. Khalifa; **Hungary:** I. Marozsán, I. Édes, I. Czuriga, A. Cziráki, K. Tóth, Á. Dongó, P. Túri, T. Forster, J. Borbola, B. Bachmann, G. Masszi, M. Orbán, G. Gerges, G. Balogh, É. Bajcsi, I. Takács, L. Nagy, B. Kisjós, A. Jánosi, A. Nagy, K. Nagy, A. Büttl, J. Lippai, Zs. Sziégel, Zs. Malkócs, A. Földi, K. Fikker, E. Szabó, R. Forrai, Z. Sebök, Prof. B. Merkely; **India:** R. Gupta, S. Natarajan, J. Dalal, R. K. Saran, A. Mehta, M. P. Samal, I. A. Khan, T. Ghose, J. P. S. Sawhney, T. Roy, S. Chandra, S. Modi, M. M. Singh, G. Vijayaraghavan, L. Sreenivasa Murthy, S. S. Ramesh, Dr Dayasagar Rao V, M. S. Chenniappan, A. Vadavi, K. Kunhali, K. Srinivasa Reddy, Su. Thillai Vallal, P. Khera, B. Prasad, D. Shukla, A. K. Trivedi, R. Ahuja, J. Rawal, R. Karnik, M.S. Hiremath, D. K. Kumbha, S. R. Shetty, N. S. Chonkar, Late MJuneja, B.K. Goyal; **Ireland:** R. Sheahan, C. Daly, C. Vaughan, S. Fleming, P. Shiels, P. Keelan, T. Kiernan, B. Day, K. Kelly, F. MacNamara, B. Maguire, A. Clifford, A. O'Gara; **Italy:** G. Guardigli, G. Pes, G. Caridi, A. Frattola, B. Doronzo, G. Riccioni, A. Lacchè, F. Massari, S. Orazi, D. Carretta, M. Provvidenza, R. Pedretti, A. Nicolino, S. Felis, V. Pernice, A. Gaglione, P. Gori, P. Martina, V. d'Alessandro, F. Giacomazzi, P. Terrosu, C. Cernetti, R. Antonicelli, G. Ansalone, M. Balbi, C. Tamburino, L. Moretti, S. Tantillo, F. Patriarchi, F. Proietti, G. Sinicropi, G. Maragoni, V. Mallamaci, D. d'Este, P. Azzolini, E. Brscic, S. Bongo, A. Gigantino, G. Perna, M. S. Mayer, C. La Rosa, G. Muscio, V. Scollo, F. Magliari, C. Petrillo Pio, M. Castellari, P. Di Pasquale, Dr Scalzo, F. Saporito, N. Capuano, F. Alitto, N. Marchionni, M. Turiel, A. Bianco, C. Greco, L. Marullo, R. Testa, A. Vicentini, S. Novo, F. La Varra, L. Tavazzi, M. R. Conte, Z. Lazerevic, F. Colivicchi, C. Macchi, J. Dalle Mule, G. Sibilio, A. Achilli, C. Proto; **Korea:** S.M. Kang, B. K. Koo, S. K. Hong, W. Kim, S. H. Lee, B.S. Yoo, H. S. Seo, H. C. Gwon, D. H. Kang, H. M. Kwon, I. H. Chae, S. J. Oh, J. H. Shin, C. W. Goh, Y.S. Byun, J. H. Zo, T. J. Hong, D. S. Kim, T. J. Cha, J. K. Ryu, Y. J. Kim, J. Y. Hwang, S. H. Hur, M. H. Jeong, S. K. Oh, D. K. Jin, K. T. Jung, J. Y. Rhew, S. Lee, D. W. Jeon, S.J. Yoon, S. H. Kim; **Latvia:** I. Mintale, G. Latkovskis, S. Hansone, N. Rozkova, A. Baika, I. Jasinkevica, S. Abele, I. Laizane, N. Pontaga, V. Ecina, I. Mihailova, A. Kondratovica; **Lithuania:** A. Laucevičius, R. Jurgaitienė, R. Šlapikas, G. Barauskienė, E. Jankauskienė, S. Revienė, D. Zaronkienė, O. B. Šlapikienė, N. Kupstytė, E. Rinkūnienė, R. Steponienienė, J. Kojelienė, J. Badarienė, V. Dženkevičiūtė, E. Sadauskienė, I. Butkuvienė, R. Stankevičius, R. Paliulionienė, R. Snikytė, R. Mažutavičius; **Malaysia:** A. N. Jamaluddin, A. A. Abdul Rahim, A. K. Mohamed Yusof, K. H. Chee, M. A. Sadiq, S. Ramanaidu, K. H. Sim, T. K. Ong, A. Y. Y. Fong, B. C. Chang, S. K. Chua, Y. L. Cham, N. H. Mohd. Amin, S. K. Tan, N. Z. Khiew, A. Said, C. K. Abdullah, Y. W. Cheah, J. Sinnadurai, K. K. H. Lau, C. K. Choor, K. K. Sia, C. C. Ang, J. S. Awtar Singh, M. Z. Abdul Wahab, C. K. Wong, A. K. Ghapar, A. Muthu, K. A. Mahendran, A. H. Jaafar, K. H. Ng, A. I. Ruhani, H. A. R. Tahir, H. Abdul Manap, B. S. K. Ch'ng, E. T. Ch'ng, A. S. Abdullah, O. Ismail, A. S. Sahar, B. B. Abdul Kareem, M. A. Sheikh Abdul Kader, S. K. Ma, K. K. Chan, T. H. Goh, A. Singh, H. B. Liew, C. M. Chu, R. K. M. Bhaskaran, R. P. Shah, K. L. Joseph, H. Noor Hasni, W. K. Ng, G. H. Choo, N. Saaidin, C. K. Yeo, V. M. Lai, Y. C. Lai, M. H. Tay, B. A. Lim; Brunei: H. N. Luqman; **Mexico:** Guillermo Llamas Esperon, J. de Jesús Zuñiga Sedano y America Alvarez, F. Azar Manzur, C. Jerjes Sánchez, J. Cerda Rojas, J. Carrillo Calvillo, F. Petersen Aranguren, C. Martínez Sánchez, A. Álvarez Sangabriel, G. Vieyra, S. González Romero, A. Puente Barragán, F. Redding Escalante, J. Chávez Paez, E. Fernandez Valadez, E. Gaxiola, L. E. Manautou, O. Henne Otero, M. Barrera Bustillos, J. L. Leyva Pons, E. Gómez Álvarez, J. R. Romo Santana, J. Martínez Redding, A. Arias Mendoza, I. Rodríguez Briones, J. de Jesús Rivera Arellano, J. L. Arenas León, M. Alcocer Gamba, E. Alexanderson, M. E. Ruíz Esparza, L. A. Elizondo Sifuentes, J. L. Briseño, E. Sandoval Rodriguez, M. L. Fuantos Delgado, S. Sandoval Navarrete, U. Casas Juarez, A. Loera Pinales, A. Castro, R. Cue Carpio, E. Rodríguez, G. Rojas, G. Solache, R. Díaz Juárez, R. Baleón, C. Ferreyra Solorio, H. A. Ramírez Reyes, M. López Martínez, M. A. Romero Maldonado, J. Escobedo de la Peña, J. Hilario Jiménez Orozco, F. A. Reyes Cisneros, J. Álvarez Gil, G. Bautista López, M. Odín de los Ríos Ibarra; **Netherlands:** I. I. Tulevski, G. A. Somsen, K. Miedema; **Poland:** I. Chlewicka, P. Brodzicki, T. Stasiuk, P. Szałkowski, W. Kulig, M. Maliszewski, K. Królicka, J. Zdrojewska, I. Nikodemka, A. Szpak, M. Wrębiak-Trznadel, A. Prokop, M. Szulc, A. Olszewski, W. Kępa, J. Banach, M. Węglarz, A. Gałuszka-Bilińska, A. Królak, E. Cisowska-Drozd, K. Orzechowski, M. Jeżewska, K. Adamaszek, G. Głanowska, T. Pitsch, G. Matuszewska, A. Nowowiejska-Wiewióra, M. Dereń, G. Walawski, M. Sołtysiak, R. Wysocki, G. Jaroński, A. Drzewiecka, T. Ługowski, A. Jankowska, P. Błaszczak, J. Drozd, E. Łotocka, R. Duchowska, D. Sobczyk, P. Jarmużek, M. Sidor, D. Adamczyk-Kot, J. Sudnik, J. Cygler, I. Skoczylas, B. Poprawa, L. Kisiel, U. Kossowska, B. Sikorska-Buczowska, K. Modzelewska, B. Demianiuk, W. Streb, T. Mularek-Kubzdela, P. Bogdański, E. Kaźmierczak, R. Zimoląg, J. Lorenc, R. Furtak, A. Regulska, M. Winter, M. Fic, P. Turek, E. Nowicka, W. Bryl, L. Lenartowska, O. Jerzykowska, M. Maćków, W. Gadziński, R. Kacorzyk, D. Zalewska, R. Sadłowski, J. Słaboszewska, M. Gruchała, A. Frankiewicz, J. Walczewska, A. Adamkiewicz-Piejko, R. Chyrek, L. Jankowska; **Portugal:** A. Correia, A. Girão, Á. Herdade, A. Sequeira, A. Tavares E Taveira, A. Gonzaga, A. Ribeiro, A. Albuquerque, A. Fernandes, A. Estriga, A. Rocha De Almeida, A. Lourenço, A. Pereira, A. Faria, B. Carvalho De

Moura, C. Camossa, C. Alves, C. Aguiar, C. Rodrigues, E. Wellenkamp, F. Fernandes De Sousa, F. Moreira Pinto, F. Matias, G. Silva Alves, G. Bragança, G. Proença, G. Mariano Pêgo, H. Vinhas, I. Arroja, J. Morais, J. Silva E Sá, J. Vasconcelos, J. Matos, J. Freitas, J. Ferreira, J. Costa, J. Alcaravela, J. Mimoso, J. Antunes, J. Ferreira Dos Santos, J. Nobre Dos santos, J. Fernandes, J. Chambel De Aguiar, J. Moreira, J. Carvalho, J. Forte De Carvalho, J. Calaça, L. Simões, L. Lopes Antunes, L. Soares, L. Semedo, L. Macedo, L. Sargento, L. Basto, L. Rebelo, L. Oliveira, M. Catarino Carvalho, M. Alves Costa, M. C. Gamboa, M. F. Ferrão E Vasconcelos, M. H. Custódio, M. I. Mendonça, M. J. Pinto Vaz, M. Espiga De Macedo, M. Lazaro, M. Martins Oliveira, N. Pelicano, N. Lousada, O. Rodrigues, P. Matos Dias, P. F. Fonseca, P. Ferreira, P. Farto E. Abreu, P. Monteiro, R. Seabra Gomes, R. Carvalho, R. Santos, R. Rosado Soares, S. Baptista, S. Reis Monteiro, V. Gil, V. Sanfins, V. Martins; **Romania:** M. Anghel, C. Arsenescu Georgescu, K. Babes, M. Banu, R. Beyer, I. Bratu, A. Bumbu, R. Capalneau, O. D. Chioncel, T. Chiscaneanu, R. Christodorescu, N. Cindea Nica, M. Cinteza, S. Coman, M. Constantinescu, E. Craiu, G. A. Dan, D. C. Dan, A. Dan, C. M. David, M. Dorobantu, D. Farcas, V. Firastrau, C. Florescu, A. Ghicu, A. Giuca, R. Grigoriu, D. D. Ionescu, L. C. Iosipescu, M. V. Ivan, D. Lighezan, S. Magheru, M. Magherusan, S. M. Marinescu, A. C. Motoc, R. Musetescu, M. Rau, L. Rotaru H. Rus, O. Sirbu, L. Sorodoc, C.M. Spinu, G. Stanciulescu, C. Statescu, P. M. Toringhibel, R. Trambitas, N. Trocan, A. Tudose, D. Vinereanu, M. Zagreanu, R. Motomancea, C. Militaru; **Russia:** D. Dymova, N. Semenova, A. Zherebtsova, V. Fedoskin, N. Gurianov, N. Bolotova, V. Knyazeva, T. Spitsina, N. Sytilina, N. Atamanchuk, M. Giorgadze, S. Zarechnova, S. Kutuzova, Y. Sharapova, I. Stelmakh, O. Sinyukova, S. Rostik, L. Evtukhova, L. Sukhanova, T. Makhieva, S. Tereshko, V. Kolesnikov, E. Kochurov, B. Marchenko, S. Nurgalieva, Z. Galeeva, E. Andreicheva, V. Zakirova, L. Baleeva, A. Minsafina, N. Borodina, Y. Arkhipova, T. Krechunova, M. Scherbak, A. Merkhi, N. Aksyutina, O. Ratovskaya, E. Suglobova, Y. Kozhelenko, E. Potapova, G. Poluyanov, N. Naberezhnova, E. Daniels, K. Atueva, L. Tsaryabina, A. Kurekhyan, N. Khishova, E. Dubinina, O. Demina, P. Mochkina, E. Bukanina, S. Tolpygina, Y. Polyanskaya, A. Malysheva, T. Kheliya, A. Serazhim, V. Voronina, Y. Lukina, R. Dubinskaya, N. Dmitrieva, M. Kuzyakina, N. Khartova, N. Bokuchava, E. Smirnova, A. Esenokova, Y. Pavlova, O. Smirnova, P. Astrakhantseva, S. Bykovskaya, O. Charikova, K. Berdnik, T. Karaseva, L. Zhabina, N. Oleinikova, O. Dzhkha, S. Grigoryan, E. Yakovenko, T. Ivaschenko, I. Kiseleva, T. Shokina, M. Novikova, A. Khodanov, L. Popova, L. Latyntseva, O. Kilaberiya, K. Makarenkova, N. Nosova, T. Gerasimova, L. Boikova, N. Sharapova, Y. Kulikova, N. Pasechnaya, E. Bulakhova, S. Kurochkina, I. Bratishko, O. Likhobabina, E. Panova, N. Voronina, N. Bizyaeva, O. Gusev, N. Nevolina, T. Arsentieva, I. Budanova, E. London, Melnikova, A. Khripun, L. Polyayeva, E. Osadchuk, O. Krasnoslobodskaya, N. Yakimova, A. Lugin, Y. Sosnova, E. Il'ina, G. Kositsina, I. Shanina, S. Kostomarova, M. Malgina, M. Omelchenko, I. Gorlova, S. Eidelman, A. Salakhova, B. Bondarenko, R. Sopia, N. Baboshina, N. Eliseeva, F. Tumarov, N. Petrochenko, I. Khudina, N. Arabadzi, V. Samakhovets, L. Tkhorzhevskaya, T. Sinotova, E. Zherlitsyna, S. Minkin, N. Petrova, Y. Tikhonov, N. Shmakova, V. Abduvalieva, M. Kuzmicheva, L. Nikolaeva, O. Varezchnikova, T. Dmitrieva, E. Mikhailova, Y. Yanina, L. Kapustina, Z. Vazhdaeva, G. Golovina, N. Fedorova, I. Nikolaeva, O. Fillipova, L. Gareeva, F. Tuktarova, N. Khmelevskikh, V. Karnot, M. Golub, I. Surovtseva, V. Kulygina, N. Shelomova, I. Kruglova, I. Pokrovskaya, O. Rodina, L. Polkina, N. Biryukova, E. Filippova, E. Kotova, T. Ignatieva, T. Alekseeva, L. Gruznykh, E. Mozerova, E. Moksyuta, E. Kosachek, N. Srtumilenko, O. Baranova, T. Voronova, L. Bayakhchan, I. Grudtsina, L. Gorshkova, O. Shamsutdinova, M. Getman, I. Gorodilova, N. Karnaukhova, V. Rotenberger, L. Isaeva, G. Lebischak, V. Ryzhkova, E. Usoltseva, D. Mescharekova, E. Tavluva, E. Mineeva, M. Stikhurova, L. Kosareva, O. Grechishkina, S. Nikishina, A. Ilyukhina, O. Gureeva, I. Soin, S. Erofeev, S. Lebedev, I. Kudryavtsev, E. Gamzatov, N. Maximchuk, L. Grekhova, L. Kolevatova, M. Kazakovtseva, O. Kolesova, L. Zharikova, V. Kukaleva, N. Starostina, I. Grushetskaya, V. Kazachkova, I. Pashentseva, S. Shimonenko, I. Sirazov, A. Chernozemova, O. Golubeva, S. Mingalaeva, E. Zatsarina, D. Kozlov, N. Davydova, O. Larina; **Saudi Arabia:** K.F. Alhabib, A. Hersi, H. Al-Backer, H. AlFaleh, A. Mobeirek, M. Arafah, M. Al-Shamiri, F. El-Shaer, M. Al Zaibag, M. Bdeir, I. Suliman, A. Mukhtar, H. Omar, A. Jamiel, A. Elkraih, M. Alanazy, M. Habab, K. Ashmak, R. Nourallah; **Singapore:** K. H. Mak, B. Singh, T. S. Chee, C. C. Koo, L. P. Low, V. P. Nair, K. S. Ng, S. S. S. Quek, E. H. M. Tan, A. L. R. Ng, H. H. Chuang; **Slovakia:** G. Kamensky, G. Kaliska, J. Murin, K. Hatalova, L. Gaspar, I. Simkova, J. Dubrava, J. Pjontek, D. Pella, A. Banikova, M. Szentivanyi, F. Kovar, J. Benacka, I. Gonos, F. Fazekas, P. Kycina; **Slovenia:** J. Poles, Z. Fras, A. Pernat, A. Veternik, N. Černič-Šuligoj, M. Kerbev, I. Krajnc, P. Zagožen; **South Africa:** A. Alam, B. Brown, B. Luke, E. Variava, R. Nethononda, S. Joubert, P. Matthews, L. Nkombua, V. Antia, D. P. Naidoo, J. Bhayat, S. K. George, N. Ranjith, G. H. M. Vawda, S. Govender, I. Soosiwala, K. Shein, M. Panajatovic, J. Flores, M. S. H. Khan, S. Blignaut, K. Coetzee, L. Burgess, V. Freeman, H. D. Theron; **Spain:** M. A. Arnau, Vives, F. J. Abardía Oliva, P. Aguar Carrascosa, V. Albero Martínez, J. M. Alegret Colomer, E. Alegría Ezquerro, C. A. Almeida Fernández, N. Alvarenga Recalde, A. Alvarez Auñon, P. Alvarez García, C. Amo Fernández, C. Amoros Galito, R. Ancín Viguiristi, M. Aparici Feal, A. Ardiaca Capell, J. Arnedillo Pardo, G. Arquero García, V. Arrarte Esteban, M. Baquero Alonso, P. Barahona Pérez, J. L. Bardají Mayor, V. Barriales Alvarez, A. Batalla Celorio, B. Berzal Martín, D. Bierge Valero, J. Blanco Castiñeiras, F. Bosa Ojeda, C. Botana Penas, H. Brufau Redondo, J. Bruguera Cortada, R. Cabrera Solé, F. Calvo Iglesias, S. Cantabrana Miguel, R. Carrillo Cardoso, M. Casanovas Pié, P. Casas Giménez, E. Castillo Lueña, J. A. Castillo Moreno, M. Castillo Orive, A. Chirivella González, J. M. Chopo Alcubilla, V. Climent Payá, M. A. Cobos Gil, J. L. Colomer

Martín, A. Concepción Clemente, R. Cortés Sánchez, D. Cremer Luengo, S. Darnes Soler, J. de Andrés Novales, R. De Castro Aritmendiz, J. de Juan Baguda, M. de los Reyes López, J. L. Delgado Prieto, J. L. Díaz Díaz, C. Escobar Cervantes, J. Ezcurdia Sasieta, L. Facila Rubio, C. Falces Salvador, P. Federico Zaragoza, R. Fernández Alvarez, F. Fernández de la Cigoña, L. A. Fernández Lázaro, L. C. Fernández Léoz, R. Fernández Mouzo, M. Fernández-Valls Gómez, B. Ferreiro Rodríguez, C. Franco Aranda, J. Freire Corzo, J. Fuertes Alonso, J. Fuertes Beneitez, E. Galve Basilio, C. García García, M. J. García Martínez, M. J. García González, S. García Ortego, C. García Pindado, V. García Saavedra, J. García-Moll Marimón, R. Gascuña Rubia, D. Gentille Lorente, H. Gervas Pavón, R. Gilabert Gómez, J. J. Gómez Barrado, J. J. Gómez Doblas, M. J. Gómez Martínez, C. González Juanatey, V. González Toda, M. Gonzalvez Ortega, E. Gordillo Higuero, J. Hernández Afonso, D. Herrera Fernández, E. Homs Espinach, A. Idoate Gastearena, M. Irurita Latasa, R. Izquierdo González, M. Jaquet Herter, M. Lagares Carballo, J. A. Lastra Galán, B. Limeres González, M. A. López Aranda, L. López Barreiro, D. López Gómez, A. López Granados, V. López Mouriño, J. L. López-Sendón, M. Luaces Méndez, L. Mainar Latorre, E. Marín Araez, F. Marín Ortuño, A. Martín Santana, J. Martínez Florez, J. Martínez González, J. F. Martínez Rivero, D. Marzal Martín, G. F. Mazzanti Mignaqui, A. Melero Pita, E. Molina Laborda, G. Miñana Escrivá, V. Montagud Saavedra, M<sup>a</sup> A. Montero Gaspar, J. Mora Robles, J. Morales González, J. Moreno Arribas, M<sup>a</sup> T. Moreno Casquete, C. Moya López, N. Murga Eizagachevarría, F. Narro García, J. Navarro Manchón, C. Navas Navas, E. Novo García, J. A. Núñez Gamero, A. Ordóñez España, J. A. Ortiz de Murua López, E. Orts Soler, E. Otero Chulian, L. Pastor Torres, A. J. Paule Sánchez, M. A. Paz Bermejo, V. Pedrosa del Moral, G. Peña Pérez, J. Á. Perea Egido, L. Pérez de Isla, S. Pérez Ibiricu, M<sup>a</sup> A. Pérez Martínez, M. Pérez Paredes, E. Peris Domingo, A. M. Peset Cubero, J. Pinar Sopena, C. Pindado Rodríguez, M<sup>a</sup> J. Pinilla Lozano, C. Piñero Ramírez, Y. Porras Ramos, E. Prieto Moriche, F. Ramos Ariznabarreta, M. Rayo Gutiérrez, J. M. Roca Catalán, A. Rodríguez Almodóvar, J. Rodríguez Collado, A. Rodríguez Fernández, J. A. Rodríguez Fernández, J. A. Rodríguez Hernández, I. Rodríguez Tejero, I. Romeo Castillejo, D. Romero Alvira, J. A. Romero Hinojosa, C. Romero Menor, P. Rossi Sevillano, E. C. Rueda Calle, J. Rueda Soriano, P. Ruiz Pérez, T. Sagastagoitia Gorostiza, I. Sainz Hidalgo, M. Sandin Rollán, S. Santaolalla Rodríguez, E. Santos Olmeda, J. L. Santos Iglesias, M. L. Sanz Rodríguez, I. Segura Laborda, S. Serrano García, B. Sevilla Toral, L. Silva Melchor, E. Simarro Martín-Ambrioso, R. Sola Casado, C. Soriano Navarro, M<sup>a</sup> I. Soto Ruiz, P. Talavera Calle, E. Teijeira Fernández, P. L. Torres Diaz, A. Troncoso Gil, F. Trujillo Berraquero, M. A. Ulecia Martínez, J. Umaran Sánchez, C. Vaticón Herreros, A. Vázquez García, J. L. Vega Barbado, E. Velasco Espejo-Saavedra, T. Vicente Vera, M. Vida Gutiérrez, C. Villar Mariscal, G. Vives Boniato, L. Wu Amen, G. Yanes Bowden, J. C. Yañez Wonenburger, J. L. Zamorano Gómez, J. Zarauza Navarro; **Switzerland**: P. Monnier, A. Jaussi, A. Forclaz, M. Grobéty, L. Schlueter, C. Vuille, C. A. Nacht, D. Evéquoz, S. Ciaroni, F. Dominé, J. Bérubé, H. Rickli, J. Hellermann, R. Koller, G. Bourgeois, R. Engel, C. Niederberger, P. Stadler, M. Gnädinger, C. Schmied, T. Wettstein, P. Hilti, C. A. Chételat, F. Sepulcri, H. Brunner, J. Schindler, M. Kraus; **Thailand**: V. Vivekaphirat, S. Panpunnung, S. Kuanprasert, W. Wongcharoen, A. Phrommintikul, J. Harinasuta, O. Si, V. Chaithiraphan, T. Boonyasirinant, W. Boonyapisit, M. Kittipovanonth, A. Buakhamsri, D. Piyayotai, P. Hutayanon; **UK**: S. Junejo, O. Aiyegbayo, H. Ancliff, C. Bradshaw, R. Cervenak, H. Choi, E. George, I. Gilmour, D. Gough, A. Idrissi-Sbai, J. Ingham, B. Al-Khalidi, A. Liston, J. Mackrell, I. Pattison, R. Ramachandran, N. Ray, G. Reddy, I. Sen, K. Shetty, L. Singh, M. Stanley, A. Wallace, M. Weatherhead, T. Gilbert, G. McCansh, S. Higgins, C. Killeen, I. Cromarty, P. Franklin, E. Pinch, A. Dhesi, C. Darnedde, M. Lawrence, H. Simper, M. Noble, G. Dalton, L. Stevens, P. Berry, C. Hand, R. Oliver, H. Jones, P. Sampson, N. Taylor, R. Grogono, J. Dalrymple, A. Martin, S. Thurston, K. Elsby, M. Vallis, G. Morrison, C. Lang, A. Watson, A. Thomson, H. Dougall, B. La Hay, L. Compson, A. McCracken, J. Calder, F. Weber, D. Richmond, R. Brownlie, G. Brown, H. MacCowan, A. Heap, M. Perry, L. A. Holden, G. Scott, N. Haldane, S. Hood, I. Cullen, J. Bell P. McNaught, M. Sharif, J. Dunn, D. Hay, S. Ross, R. Shaw, L. Hay, S. Langridge, R. Burns, L. Crawford, A. Kennedy, D. Logan, P. McAlavey, M. Brown, P. Costello, G. McLaren, A. Potter, J. McPherson, M. Drijfhout, J. Finlayson, D. Troup, A. Woodall, J. Pearce, S. Williams, W. Parker, A. Yusuf, I. Benett, P. Bishop, H. Thomas, I. Caldwell, P. Ormiston, S. Kwok, S. Wright, N. Kanumilli, P. Saul, H. Milligan, I. Wilkinson, A. Vance, N. Paul, C. Paul, I. Shaikh, R. Ellis, N. Vites, R. Steeds, D. Goodwin, A. Aftab, S. Banham, N. Chauhan, M. S. Grocutt, A. Gupte, R. Jordan, B. S. Jheeta, K. Ladha, M. Nazir, R. Pal, R. P. Patel, R. McManus, A. Singal, P. Saunders, A. B. Syed, A. Bahal, H. Dau, D. M. Walker, R. McNeilly, A. Bolidai, N. MacCarthy, D. Lawton, M. Vardhani, G. Sengupta, D. Kinloch, F. Howie, A. Serrano-Garcia, S. E. Paget, R. Till, P. Seal, J. Morrell, T. Maxwell, G. Singh, D. Warden, R. Elias, C. Dixon, R. K. Pandey, V. Challenor, S. Davies, M. Gibbs, A. Gillet, C. Goldie, I. Jarvis, P. Johnson, M. Malden, J. Moore, C. Morton, K. Nehrig, P. Sheringham, G. Wilson, J. Halcox, I. O'Connor, K. Ling, D. Edwards, H. Charles, A. Weatherup, E. Davies, N. Watkins, D. Morgan, R. Davies, A. Lindsay, D. Beacock, R. Balai, P. Kirmond, P. Brindle, C. Bundy, T. Cahill, A. Dayani, P. Eavis, S. Mohr, S. Hayne, C. Krasucki, M. Micheals, I. Orpen, I. Parker, R. Sewell, D. Sharp, A. Smith, A. Stevens, J. Upton, J. Victory, C. Wernham, R. Davis, C. Mays, M. Andrews, J. Takhar, C. Travill, P. Choudhury, W. Matta, A. Ihonor, C. O'Dong, S. Rahman, P. Singer, S. Gillam, P. S. Bath, N. Razzaq, O. O'Toole, P. Rowe, H. Williams, P. Kalra, A. Allcock, A. Tucker, V. Sprott, K. Kyd, G. Cunliffe, C. Arden, A. Bateman, G. Kassianos, D. Sinclair, C. Turner, R. Jagathesan, F. Sattar, A. Ashford, A. Chukwu, H. Taylor, R. Pradhan, T. Rundell, R. Howlett, R. Bietzk, R. Patel, M. Myint, M. Partington, F. O'Reilly, M. Baverstock, S. Dixon, M. Tennekoon, N. Brand, P. Haines, P. Keller, S.

Whetstone, R. Davis, C. Mays, M. Andrews, J. Takhar; L. Parker, M. Anscombe, G. Beale, L. Murphy, A. Smith, S. Brown, J. Lindford, A. Serrano, S. Preston, R. Sethi, S. Hutchinson; **Ukraine:** O. Kovyrshyna, V. Rogozhyna, T. Kiver, V. Vasylenko, L. Kucheryava, S. Salimova, V. Alekseenko, O. Gukov, I. Myhailiv, L. Kardashevskaya, O. Prikolota, O. Bashkirtcev, E. Andreev, L. Tkachenko, M. Mospan, V. Batushkin, D. Reshotko; L. Safonova, A. Ogorodnichuk, S. Pustovit, S. Romanov, L. Burlakova, Y. Voloshko, V. Lafarenko, Z. Vlasuk, O. Leshchuk, S. Chushak, V. Koval, O. Stasuk, O. Pogrebna, S. Kornienko, S. Tikhonova, T. Fesenko, T. Kuzmina, O. Ushakov, N. Vechtomova, L. Potapska, I. Illushechkin, E. Kryvenkova, O. Lysunets, O. Tsygankov, L. Bardachenko, L. Voloshyna, V. Ginzburg, L. Franskyavichene, T. Korotich, N. Vyshnevaya, N. Bilous, S. Kulinich, V. Kulik, I. Sadykova, O. Zalyzniak; T. Berezhna, S. Molotyagina; **Vietnam:** L. V. Nguyen, M. H. Pham, H. T. Pham, N. H. Khong, K. B. Do, T. B. LE, P. A. Do, T. C. Do, N. Q. Nguyen, Q. H. Do, K. C. Vu, N. H. Pham, T. H. T. Pham, M. C. Ta, D. P. Phan, T. T. H. Nguyen, T. T. N. Pham, T. L. To, V. T. Le, L. Dang, L. Bui, T. T. H. Pham, H. H. Phan, T. T. H. Bui, T. V. A. Tuong, T. P. Nguyen, T. H. Nguyen, B. K. Nguyen, D. B. Vu, N. S. Pham, T. Q. Do, T. S. Pham, V. D. Dang, D. T. Le, V. C. Do, T. K. L. Nguyen, H. D. Luong, T. Q. Luu, N. V. Pham, T. K. Huynh, N. T. H. Tu, K. A. Ngo, T. T. C. Nguyen, T. T. L. ONG, V. B. Doan, T. B. Kim, T. N. Vo, T. T. T. Tran, T. A. Nguyen, V. D. Tran, A. K. Nguyen, A. C. Tran, M. H. Ngo, N. H. Vu, I. T. Ly, N. P. H. Tran, L. U. P. Tran, T. N. Nguyen, T. H. Tran, P. H. Truong, T. L. Mai, V. S. Hoang, C. M. A. Bui, V. P. Dang, Q. B. Truong, M. P. Vo, V. T. Nguyen, N. H. Chau, T. T. H. Ta, H. N. Dinh, H. Tran, H. K. N. Nguyen; **West Indies:** A. Chung, E. Chung, B. Martina-Hooi, R. Angela, P. Ramoutar, R. Fillet, R. Tilluckdharry, T. Dookie, E. Foster, C. Hart, F. Omardeen, S. Ramphall, C. Lalla, R. Henry, J. Cheng, V. Elliott, H. Falconer, L. Hurlock-Clarke, R. Ishmael, G. Lalljie, K. Lee, A. Liqui-Lung, R. Massay, H. Mohammed, C. Brown, R. Daniel, M. Didier.

**Table I. Countries in the Six Defined Geographic Areas**

| <b>Region</b>          | <b>Countries</b>                                                                                                                                                                                                                                            |
|------------------------|-------------------------------------------------------------------------------------------------------------------------------------------------------------------------------------------------------------------------------------------------------------|
| West/central Europe    | Austria<br>Belgium/Luxembourg<br>Bulgaria<br>Czech Republic<br>Denmark<br>France<br>Germany<br>Greece<br>Hungary<br>Ireland<br>Italy<br>Latvia<br>Lithuania<br>Netherlands<br>Poland<br>Portugal<br>Romania<br>Slovakia<br>Slovenia<br>Spain<br>Switzerland |
| Eastern Europe         | Russia<br>Ukraine                                                                                                                                                                                                                                           |
| Gulf countries         | Bahrain<br>Kuwait<br>Oman<br>Qatar<br>Saudi Arabia<br>United Arab Emirates                                                                                                                                                                                  |
| Asia                   | Brunei<br>China<br>India<br>Korea<br>Malaysia<br>Singapore<br>Thailand<br>Vietnam                                                                                                                                                                           |
| Central/South America  | Argentina<br>Brazil<br>Mexico<br>West Indies                                                                                                                                                                                                                |
| Commonwealth countries | Australia<br>Canada<br>South Africa<br>United Kingdom                                                                                                                                                                                                       |



**Table II. Prevalence of Angina at Baseline According to Each of the Inclusion Criteria (Not Mutually Exclusive)**

| <b>Inclusion criterion</b>                                                                    | <b>Prevalence of angina at baseline</b> |
|-----------------------------------------------------------------------------------------------|-----------------------------------------|
| Documented myocardial infarction (>3 months ago) (n=18 869)                                   | 4423 (23.4)                             |
| Coronary angiography showing $\geq 1$ coronary stenosis >50% (n=19 987)                       | 3675 (18.4)                             |
| Chest pain with myocardial ischemia (n=7537)                                                  | 2541 (33.7)                             |
| Percutaneous coronary intervention or coronary artery bypass graft (>3 months ago) (n=22 826) | 3553 (15.6)                             |
| Variables are presented as count and percentage.                                              |                                         |

**Table III. 5-year Outcomes According to Anginal Status at Baseline**

| Outcome                                       | Event rate, % (95% CI) |                      | Adjusted HR (95% CI)* | P value |
|-----------------------------------------------|------------------------|----------------------|-----------------------|---------|
|                                               | Angina (n=7212)        | No angina (n=25 479) |                       |         |
| Cardiovascular death or myocardial infarction | 9.1 (8.4–9.8)          | 6.5 (6.2–6.9)        | 1.20 (1.08–1.33)      | <0.001  |
| Myocardial infarction                         | 4.8 (4.3–5.3)          | 2.9 (2.7–3.1)        | 1.50 (1.30–1.74)      | <0.001  |
| Cardiovascular death                          | 5.8 (5.2–6.3)          | 4.6 (4.4–4.9)        | 1.04 (0.92–1.19)      | 0.50    |
| All-cause death                               | 8.4 (7.8–9.1)          | 7.4 (7.1–7.8)        | 0.97 (0.87–1.08)      | 0.59    |
| Elective revascularization                    | 3.7 (3.2–4.1)          | 2.3 (2.1–2.5)        | 1.73 (1.46–2.05)      | <0.001  |

Adjusted HRs and 95% CIs calculated using Cox proportional hazard model adjusted on the same variables as in the manuscript.  
\*Relative to patients without angina at baseline.  
CI indicates confidence interval; HR, hazard ratio.

**Table IV. Baseline Characteristics of Patients Alive With Missing Angina Status at 1 and 5 Years of Follow-Up**

|                                                     | Available angina status at 1 year (n=30 558) | Missing angina status at 1 year (n=1722) | <i>P</i> value | Available angina status at 5 year (n=21 927) | Missing angina status at 5 years (n=8220) | <i>P</i> value |
|-----------------------------------------------------|----------------------------------------------|------------------------------------------|----------------|----------------------------------------------|-------------------------------------------|----------------|
| Demographic characteristics                         |                                              |                                          |                |                                              |                                           |                |
| Age, years                                          | 64.1 ± 10.4                                  | 64.9 ± 11.0                              | <0.001         | 63.3 ± 10.1                                  | 64.6 ± 10.9                               | <0.001         |
| Female sex                                          | 6852 (22.4)                                  | 378 (22.1)                               | 0.75           | 4992 (22.8)                                  | 1791 (21.8)                               | 0.08           |
| Body mass index, kg/m <sup>2</sup>                  | 27.9 ± 4.6                                   | 27.6 ± 4.6                               | 0.09           | 28.0 ± 4.5                                   | 27.7 ± 4.6                                | <0.001         |
| Cardiovascular risk factor                          |                                              |                                          |                |                                              |                                           |                |
| Smoking status                                      |                                              |                                          | 0.007          |                                              |                                           | 0.78           |
| Current                                             | 3783 (12.4)                                  | 241 (14.0)                               |                | 2740 (12.5)                                  | 1011 (12.3)                               |                |
| Former                                              | 14 158 (46.3)                                | 734 (42.6)                               |                | 10 071 (45.9)                                | 3757 (45.7)                               |                |
| Never                                               | 12 617 (41.3)                                | 747 (43.4)                               |                | 9116 (41.6)                                  | 3452 (42.0)                               |                |
| Dyslipidemia                                        | 22935 (75.1)                                 | 1249 (72.6)                              | 0.02           | 16 399 (74.8)                                | 6219 (75.7)                               | 0.11           |
| Treated hypertension                                | 21 700 (71.0)                                | 1201 (69.8)                              | 0.29           | 15 772 (71.9)                                | 5524 (67.2)                               | <0.001         |
| Family history of premature coronary artery disease | 8718 (28.5)                                  | 501 (29.1)                               | 0.63           | 6330 (28.9)                                  | 2379 (28.9)                               | 0.90           |
| Diabetes                                            | 8819 (28.9)                                  | 515 (29.9)                               | 0.35           | 6103 (27.8)                                  | 2402 (29.2)                               | 0.02           |
| Physical activity                                   |                                              |                                          | <0.001         |                                              |                                           | <0.001         |
| None                                                | 4809 (15.7)                                  | 355 (20.6)                               |                | 3113 (14.2)                                  | 1492 (18.2)                               |                |
| Light physical activity most weeks                  | 15 712 (51.4)                                | 889 (51.7)                               |                | 11 581 (52.8)                                | 3910 (47.6)                               |                |
| >20 min physical activity once or twice weekly      | 5174 (16.9)                                  | 255 (14.8)                               |                | 3745 (17.1)                                  | 1439 (17.5)                               |                |
| >20 min physical activity ≥3 times weekly           | 4856 (15.9)                                  | 222 (12.9)                               |                | 3487 (15.9)                                  | 1372 (16.7)                               |                |
| Medical history                                     |                                              |                                          |                |                                              |                                           |                |
| Myocardial infarction                               | 18 300 (59.9)                                | 1008 (58.6)                              | 0.30           | 13 158 (60.0)                                | 4752 (57.8)                               | <0.001         |
| Percutaneous coronary intervention                  | 17 896 (58.6)                                | 1062 (61.7)                              | 0.01           | 12 741 (58.1)                                | 5201 (63.3)                               | <0.001         |
| Coronary artery bypass graft                        | 7198 (23.6)                                  | 389 (22.6)                               | 0.39           | 5063 (23.1)                                  | 1871 (22.8)                               | 0.57           |
| Cerebrovascular disease                             |                                              |                                          |                |                                              |                                           |                |
| Stroke                                              | 1206 (3.9)                                   | 67 (3.9)                                 | 0.96           | 815 (3.7)                                    | 289 (3.5)                                 | 0.43           |
| Transient ischemic attack                           | 926 (3.0)                                    | 46 (2.7)                                 | 0.44           | 604 (2.8)                                    | 252 (3.1)                                 | 0.16           |
| Carotid atheromatous disease                        | 2310 (7.6)                                   | 109 (6.3)                                | 0.07           | 1563 (7.1)                                   | 619 (7.5)                                 | 0.24           |
| Peripheral artery disease                           |                                              |                                          |                |                                              |                                           |                |
| Lower extremity artery disease                      | 2988 (9.8)                                   | 176 (10.2)                               | 0.57           | 1862 (8.5)                                   | 917 (11.2)                                | <0.001         |
| Aortic abdominal aneurysm                           | 459 (1.5)                                    | 33 (1.9)                                 | 0.20           | 236 (1.1)                                    | 176 (2.1)                                 | <0.001         |
| Hospitalization for heart failure                   | 1365 (4.5)                                   | 96 (5.6)                                 | 0.03           | 807 (3.7)                                    | 390 (4.7)                                 | <0.001         |
| Atrial fibrillation/flutter                         | 2113 (6.9)                                   | 134 (7.8)                                | 0.18           | 1349 (6.2)                                   | 548 (6.7)                                 | 0.10           |

|                                                   | <b>Available angina status at 1 year (n=30 558)</b> | <b>Missing angina status at 1 year (n=1722)</b> | <b>P value</b> | <b>Available angina status at 5 year (n=21 927)</b> | <b>Missing angina status at 5 years (n=8220)</b> | <b>P value</b> |
|---------------------------------------------------|-----------------------------------------------------|-------------------------------------------------|----------------|-----------------------------------------------------|--------------------------------------------------|----------------|
| Asthma/chronic obstructive pulmonary disease      | 2228 (7.3)                                          | 141 (8.2)                                       | 0.17           | 1455 (6.6)                                          | 612 (7.4)                                        | 0.01           |
| Pacemaker                                         | 726 (2.4)                                           | 43 (2.5)                                        | 0.81           | 413 (1.9)                                           | 224 (2.7)                                        | <0.001         |
| <b>Diagnosis of coronary artery disease</b>       |                                                     |                                                 |                |                                                     |                                                  |                |
| Time since diagnosis, years                       | 6.9 ± 6.3                                           | 6.4 ± 6.2                                       | 0.006          | 6.6 ± 6.0                                           | 7.0 ± 6.4                                        | <0.001         |
| Coronary angiography performed before inclusion   | 26 085 (85.4)                                       | 1512 (88.2)                                     | 0.001          | 18 535 (84.5)                                       | 7338 (89.4)                                      | <0.001         |
| Non-invasive test performed before inclusion      | 19 016 (62.2)                                       | 1143 (66.8)                                     | <0.001         | 13 192 (60.2)                                       | 5725 (69.8)                                      | <0.001         |
| Evidence of myocardial ischemia at baseline       | 5003 (16.4)                                         | 224 (13.1)                                      | <0.001         | 3607 (16.5)                                         | 1284 (15.6)                                      | 0.10           |
| Angiographic findings                             | n=26 061                                            | n=1493                                          | 0.06           | n=18 526                                            | n =7305                                          | 0.001          |
| No significant stenosis                           | 952 (3.7)                                           | 44 (2.9)                                        |                | 709 (3.8)                                           | 228 (3.1)                                        |                |
| One-vessel disease                                | 10 710 (41.1)                                       | 654 (43.8)                                      |                | 7685 (41.5)                                         | 3173 (43.4)                                      |                |
| Multivessel disease                               | 14 399 (55.3)                                       | 795 (53.2)                                      |                | 10 132 (54.7)                                       | 3904 (53.4)                                      |                |
| <b>Coronary artery involved</b>                   |                                                     |                                                 |                |                                                     |                                                  |                |
| Left main                                         | 2694 (8.8)                                          | 120 (7.0)                                       | 0.01           | 1983 (9.0)                                          | 606 (7.4)                                        | <0.001         |
| Left anterior descending artery                   | 17 817 (58.3)                                       | 1000 (58.3)                                     | 1.00           | 12 635 (57.6)                                       | 4956 (60.4)                                      | 0.10           |
| Circumflex coronary artery                        | 10 997 (36.0)                                       | 614 (35.8)                                      | 0.91           | 7746 (35.3)                                         | 2981 (36.3)                                      | 0.11           |
| Right coronary artery                             | 13 285 (43.5)                                       | 760 (44.3)                                      | 0.50           | 9355 (42.7)                                         | 3685 (44.9)                                      | <0.001         |
| Bypass graft                                      | 2444 (8.0)                                          | 146 (8.5)                                       | 0.47           | 1682 (7.7)                                          | 671 (8.2)                                        | 0.15           |
| Left ventricular ejection fraction, %             | 56.2 ± 10.9                                         | 56.4 ± 11.8                                     | 0.46           | 56.2 ± 10.5                                         | 57.0 ± 11.3                                      | <0.001         |
| <b>Symptoms</b>                                   |                                                     |                                                 |                |                                                     |                                                  |                |
| Angina at baseline                                | 6804 (22.2)                                         | 295 (17.1)                                      | <0.001         | 5286 (24.1)                                         | 1306 (15.9)                                      | <0.001         |
| Canadian Cardiovascular Society class (if angina) |                                                     |                                                 | 0.04           |                                                     |                                                  | <0.001         |
| I                                                 | 1932 (28.4)                                         | 104 (35.3)                                      |                | 1482 (28.0)                                         | 436 (33.4)                                       |                |
| II                                                | 3639 (53.5)                                         | 141 (47.8)                                      |                | 2881 (54.5)                                         | 639 (48.9)                                       |                |
| III/IV                                            | 1233 (18.1)                                         | 50 (16.9)                                       |                | 923 (17.5)                                          | 231 (17.7)                                       |                |
| Heart failure symptoms                            | n=30557                                             | n=1717                                          | <0.001         | n=21 927                                            | n=8214                                           | <0.001         |
| No heart failure                                  | 25 907 (84.8)                                       | 1558 (90.7)                                     |                | 18 364 (83.8)                                       | 7480 (91.1)                                      |                |
| New York Heart Association class II               | 3911 (12.8)                                         | 128 (7.5)                                       |                | 3033 (13.8)                                         | 606 (7.4)                                        |                |
| New York Heart Association class III              | 739 (2.4)                                           | 31 (1.8)                                        |                | 530 (2.4)                                           | 128 (1.6)                                        |                |
| Pulse, bpm                                        | 68.2 ± 10.6                                         | 68.8 ± 10.8                                     | 0.02           | 68.3 ± 10.5                                         | 67.8 ± 10.7                                      | <0.001         |
| Systolic blood pressure, mmHg                     | 131.1 ± 16.6                                        | 130.8 ± 16.9                                    | 0.56           | 130.8 ± 16.5                                        | 131.4 ± 16.6                                     | 0.01           |
| Diastolic blood pressure, mmHg                    | 77.3 ± 10.0                                         | 76.9 ± 10.0                                     | 0.15           | 77.5 ± 9.9                                          | 77.0 ± 9.7                                       | <0.001         |

|                                                                                                                                                                                        | Available angina status at 1 year (n=30 558) | Missing angina status at 1 year (n=1722) | P value | Available angina status at 5 year (n=21 927) | Missing angina status at 5 years (n=8220) | P value |
|----------------------------------------------------------------------------------------------------------------------------------------------------------------------------------------|----------------------------------------------|------------------------------------------|---------|----------------------------------------------|-------------------------------------------|---------|
| Baseline medication                                                                                                                                                                    |                                              |                                          |         |                                              |                                           |         |
| Aspirin                                                                                                                                                                                | 26 843 (87.8)                                | 1507 (87.9)                              | 0.95    | 19 639 (89.6)                                | 6993 (85.2)                               | <0.001  |
| Thienopyridine                                                                                                                                                                         | 8253 (27.0)                                  | 514 (30.5)                               | 0.002   | 5453 (24.9)                                  | 2805 (34.3)                               | <0.001  |
| Dual antiplatelet therapy                                                                                                                                                              | 8484 (27.8)                                  | 560 (32.6)                               | <0.001  | 6064 (27.7)                                  | 2511 (30.6)                               | <0.001  |
| Oral anticoagulant                                                                                                                                                                     | 2459 (8.0)                                   | 142 (8.4)                                | 0.65    | 1574 (7.2)                                   | 720 (8.8)                                 | <0.001  |
| Oral anticoagulant and antiplatelet drug                                                                                                                                               | 1564 (5.1)                                   | 92 (5.4)                                 | 0.71    | 1027 (4.7)                                   | 482 (5.9)                                 | <0.001  |
| Lipid-lowering drug                                                                                                                                                                    | 28 258 (92.5)                                | 1568 (91.3)                              | 0.09    | 20 280 (92.5)                                | 7643 (93.0)                               | 0.11    |
| Statin                                                                                                                                                                                 | 25 399 (83.1)                                | 1363 (79.4)                              | <0.001  | 18 318 (83.5)                                | 6710 (81.7)                               | <0.001  |
| Beta-blocker                                                                                                                                                                           | 23 089 (75.6)                                | 1223 (71.2)                              | <0.001  | 16 824 (76.7)                                | 5916 (72.0)                               | <0.001  |
| Ivabradine                                                                                                                                                                             | 3074 (10.1)                                  | 104 (6.1)                                | <0.001  | 2245 (10.2)                                  | 715 (8.7)                                 | <0.001  |
| Calcium channel blocker                                                                                                                                                                | 8361 (27.4)                                  | 434 (25.3)                               | 0.07    | 5952 (27.1)                                  | 2228 (27.1)                               | 1.00    |
| Long-acting nitrate                                                                                                                                                                    | 6654 (21.8)                                  | 369 (21.5)                               | 0.82    | 4807 (21.9)                                  | 1555 (18.9)                               | <0.001  |
| Other antianginal agent                                                                                                                                                                | 4337 (14.2)                                  | 155 (9.1)                                | <0.001  | 3263 (14.9)                                  | 948 (11.6)                                | <0.001  |
| Diuretic                                                                                                                                                                               | 8876 (29.0)                                  | 483 (28.2)                               | 0.47    | 6059 (27.6)                                  | 2248 (27.4)                               | 0.67    |
| Angiotensin-converting enzyme inhibitor or angiotensin receptor blocker                                                                                                                | 23 307 (76.3)                                | 1295 (75.7)                              | 0.60    | 16 805 (76.6)                                | 6135 (74.7)                               | <0.001  |
| Insulin                                                                                                                                                                                | 1925 (6.3)                                   | 101 (5.9)                                | 0.52    | 1259 (5.7)                                   | 510 (6.2)                                 | 0.13    |
| Oral antidiabetes drug                                                                                                                                                                 | 6385 (20.9)                                  | 378 (22.0)                               | 0.27    | 4419 (20.2)                                  | 1798 (21.9)                               | <0.001  |
| Nonsteroidal anti-inflammatory drug                                                                                                                                                    | 1504 (4.9)                                   | 91 (5.3)                                 | 0.49    | 1073 (4.9)                                   | 398 (4.9)                                 | 0.90    |
| Thyroid hormone replacement therapy                                                                                                                                                    | 1332 (4.4)                                   | 75 (4.4)                                 | 0.98    | 966 (4.4)                                    | 319 (3.9)                                 | 0.05    |
| Proton pump inhibitor                                                                                                                                                                  | 7514 (24.6)                                  | 457 (26.7)                               | 0.05    | 5097 (23.2)                                  | 2264 (27.6)                               | <0.001  |
| Variables are presented as count and percentage. Includes patients with previous myocardial infarction or revascularization during follow-up. Percentages are based on available data. |                                              |                                          |         |                                              |                                           |         |

**Table V. Severity of Angina at Baseline, 1-Year and 5-Year Follow-Up, in 7212 Patients with Angina at Baseline**

| Severity                                                                                                                                                                                                                                                                                                                                   | Baseline data                             |                                                                |                                                       | 1-year data                              | 5-year data                               |
|--------------------------------------------------------------------------------------------------------------------------------------------------------------------------------------------------------------------------------------------------------------------------------------------------------------------------------------------|-------------------------------------------|----------------------------------------------------------------|-------------------------------------------------------|------------------------------------------|-------------------------------------------|
|                                                                                                                                                                                                                                                                                                                                            | Patients with angina at baseline (n=7212) | Patients with angina at baseline (but not at 1 year)* (n=2858) | Patients with angina at baseline and 1 year* (n=3660) | Patients with angina at 1 year* (n=4876) | Patients with angina at 5 years* (n=2682) |
| CCS 1 or 2 angina                                                                                                                                                                                                                                                                                                                          | 5897/7211 (81.8)                          | 2530/2857 (88.5)                                               | 2817/3660 (77.0)                                      | 4117/4873 (84.4)                         | 2285/2681 (85.2)                          |
| CCS 3 or 4 angina                                                                                                                                                                                                                                                                                                                          | 1314/7211 (12.2)                          | 327/2857 (11.4)                                                | 843/3660 (23.0)                                       | 756/4873 (15.5)                          | 396/2681 (14.8)                           |
| Number of NTG puffs per month                                                                                                                                                                                                                                                                                                              | 5.7 ± 10.0 (n=7210)                       | 3.5 ± 7.7 (n=2857)                                             | 7.5 ± 11.1 (n=3660)                                   | 5.4 ± 9.2 (n=4870)                       | 4.2 ± 6.8 (n=2680)                        |
| Number of angina attacks per month                                                                                                                                                                                                                                                                                                         | 7.8 ± 10.1 (n=7211)                       | 5.1 ± 7.9 (n=2858)                                             | 9.3 ± 11.1 (n=3660)                                   | 6.8 ± 9.3 (n=4872)                       | 5.5 ± 7.2 (n=2680)                        |
| <p>Dichotomous variables are reported as count with percentage. Continuous variables are reported as mean (SD).<br/>                     *Patients were excluded at time of an event (death, myocardial infarction, or revascularization).<br/>                     CCS indicates Canadian Cardiovascular Society; NTG, nitroglycerin.</p> |                                           |                                                                |                                                       |                                          |                                           |

**Figure I. Graphic Representation of the Number of Patients Fulfilling Each of the Four Inclusion Criteria (Not Mutually Exclusive)**

Abbreviation: MI, myocardial infarction.

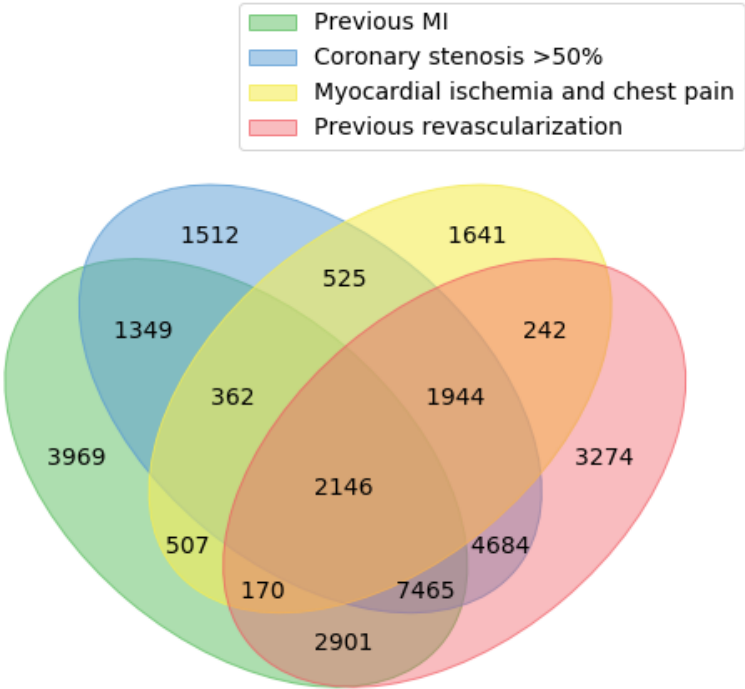

**Figure II. Evolution of Angina in Patients With Stable Coronary Artery Disease Without Imputation of Missing Values**

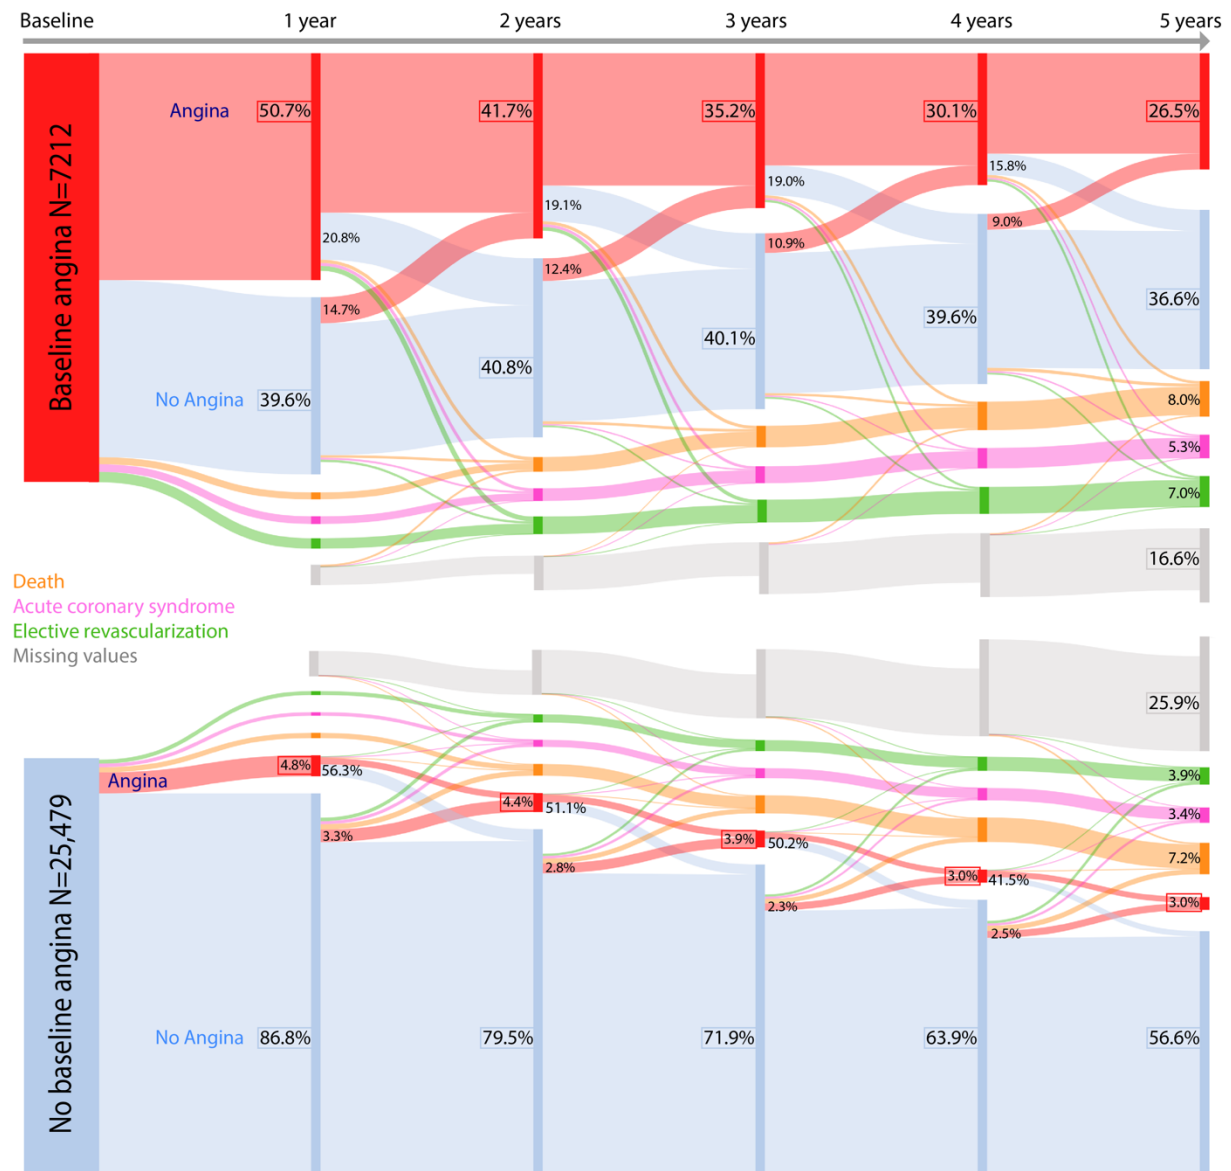

Missing values are in grey. Percentages on nodes reflect the proportion of patients compared to the initial group (baseline or no baseline angina). Percentages shown on the cross-over represent the proportion of patients according to the value of origin node.



**Figure III. Evolution of Angina in Patients with Stable Coronary Artery Disease: Full Population Scale**

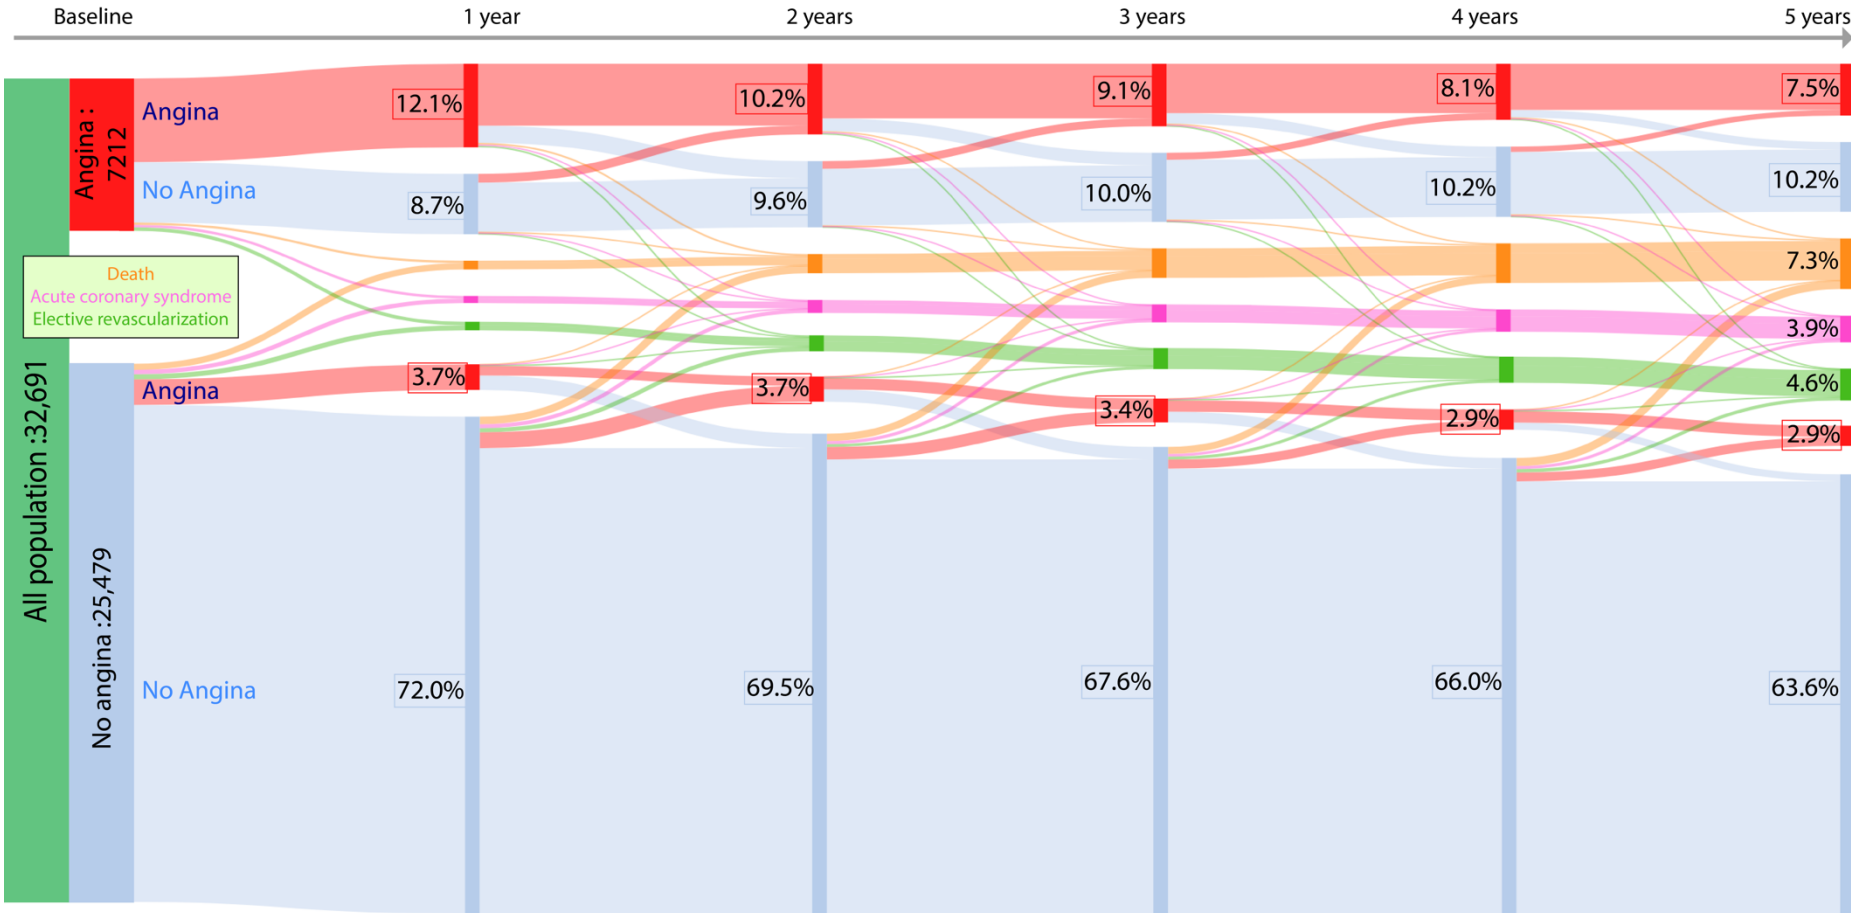

**Figure IV. Sensitivity Analysis: Exclusion of Patients From Eastern Europe; Evolution of Angina in Patients With Stable Coronary Artery Disease**

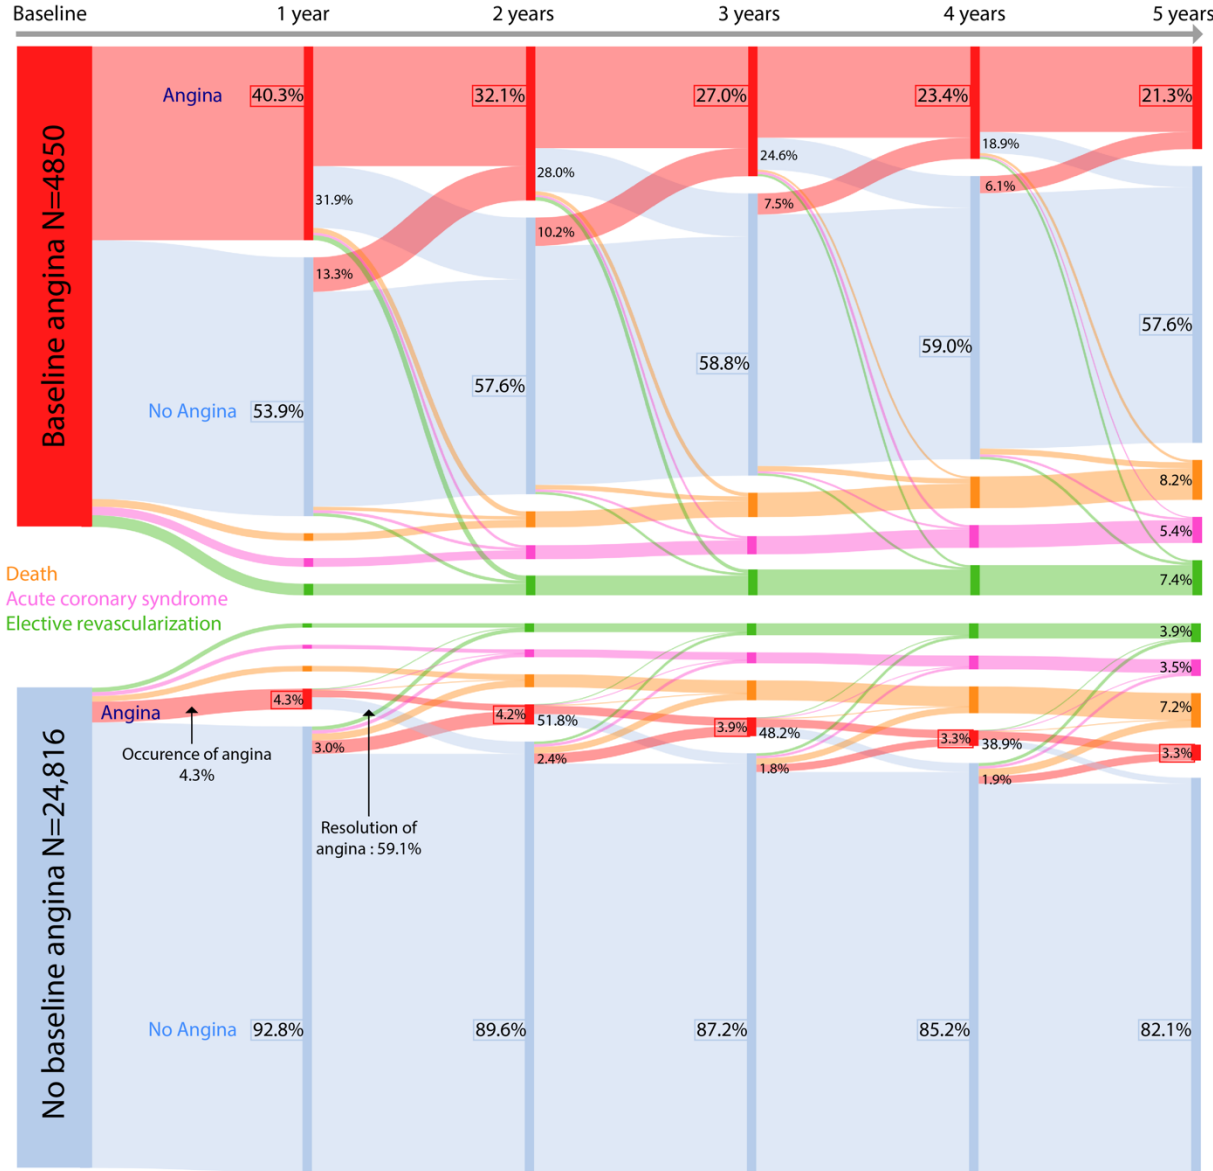

**Figure V. Sensitivity Analysis: Exclusion of Patients From Eastern Europe; Clinical Outcomes According to the Evolution of Angina at 1 Year**

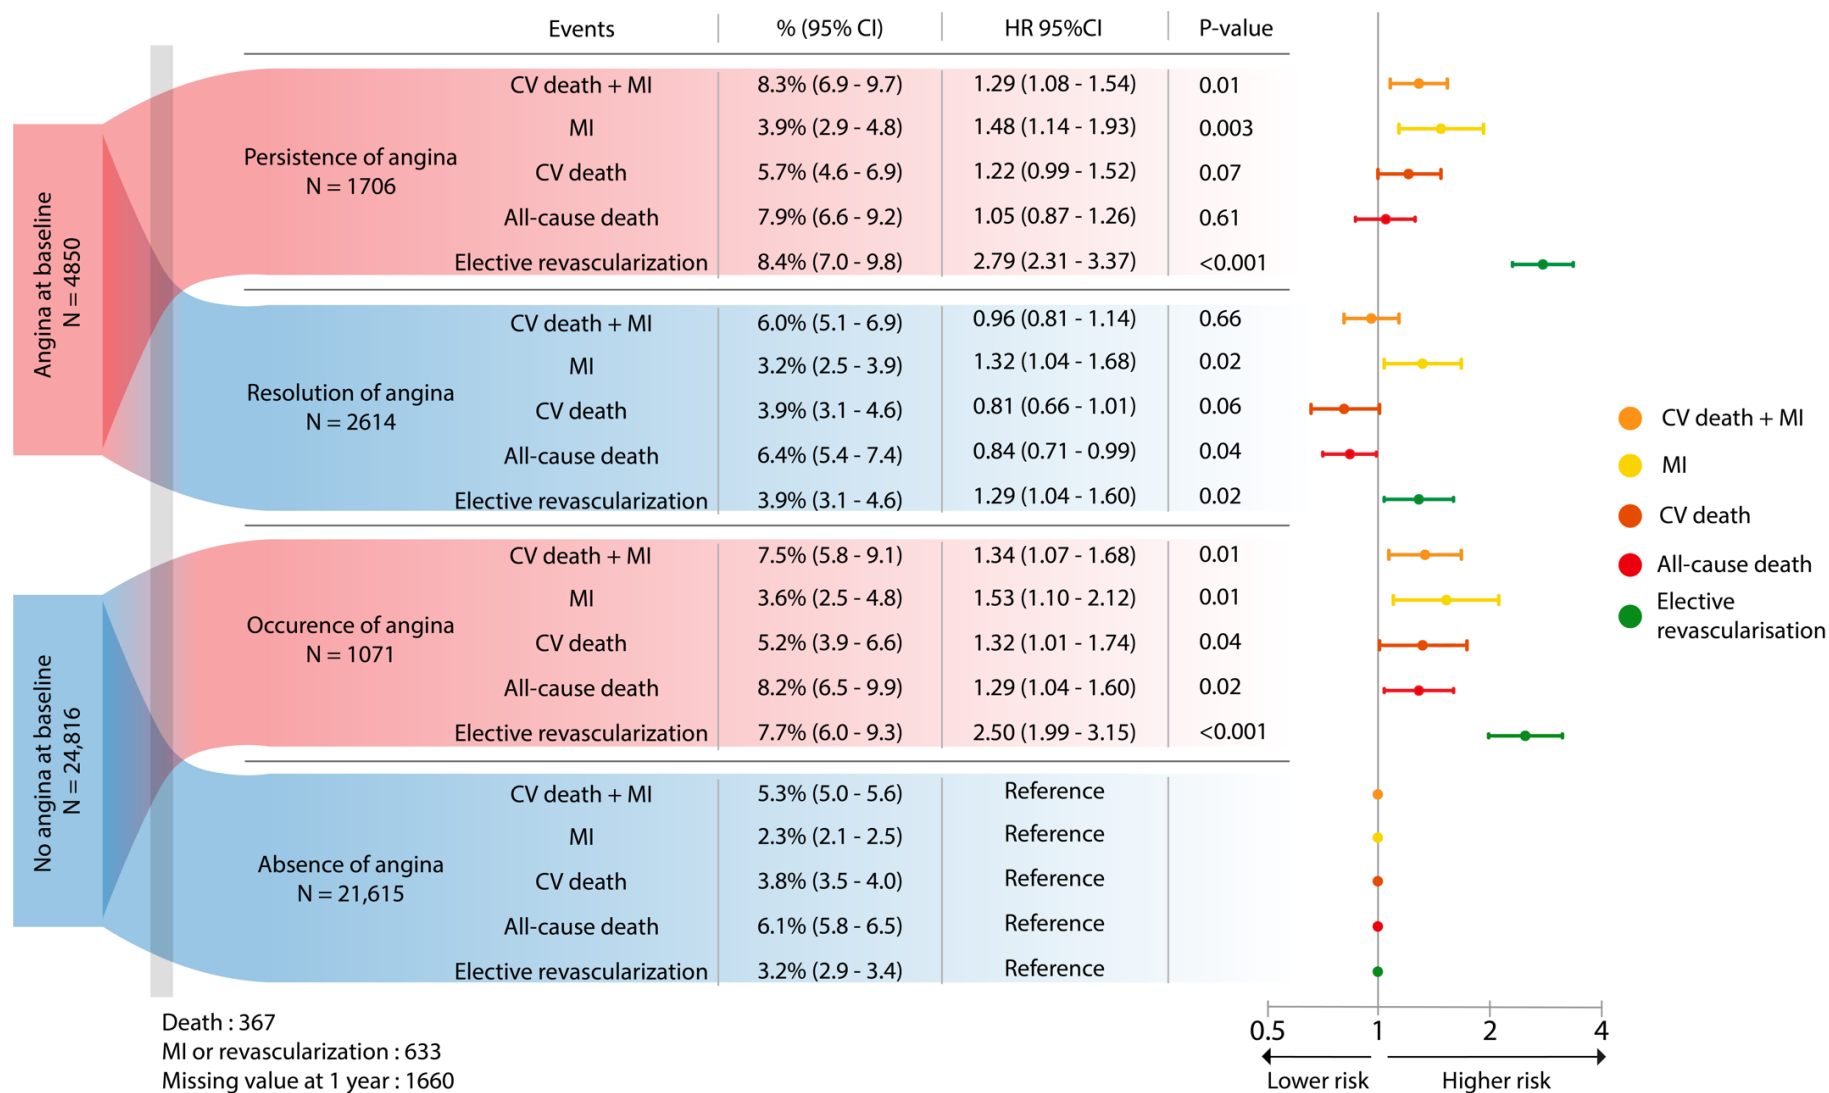

**Figure VI. Consequences of Angina and Evolution of Angina at 1 Year (Primary Outcome of Cardiovascular Death or Myocardial Infarction) in Subgroups**

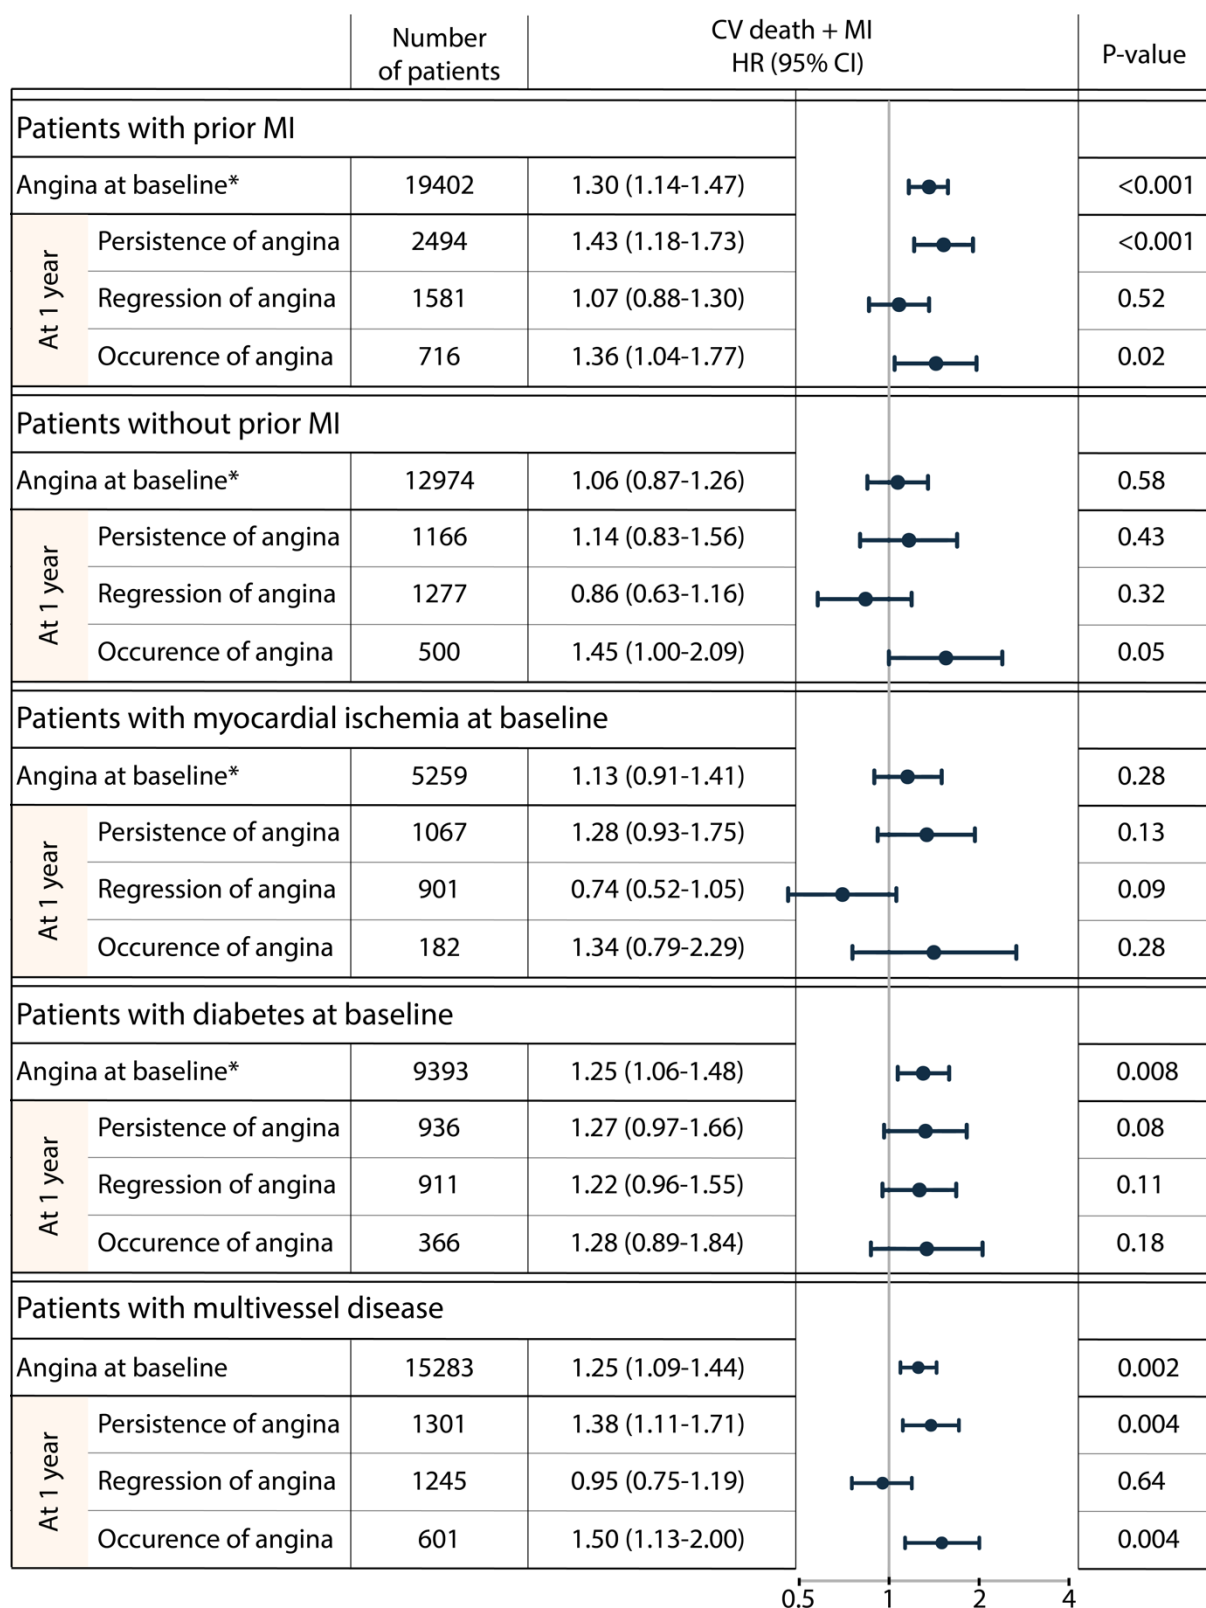

All HRs are adjusted and estimated from Cox proportional hazards model.

\*HR relative to patients who did not experience angina at baseline. Patients who did not experience angina either at baseline or 1 year were used as the reference to estimate HR according to the evolution of angina at 1 year.

Abbreviations: CI, confidence interval; CV, cardiovascular; HR, hazard ratio; MI, myocardial infarction.
